# Supplementary material for: Changes in Gravitaxis and Gene-Expression in an Euglena gracilis Culture over Time
Source: MDPI journal article supplement (doi:10.3390/biom14030327), 2024-03-09
Supplement: s1 [file s1]

**Supplement S5: Proteome sequence of corresponding transcript number**

| TK-Nr. | Proteom-Sequenzen                                                                                                                                                                                                                                                                                                                                                                                                                                                                                                                                                                                                                                                                                                                                                                                                                                                                                                                                                                                                                                                                                                                                                                                                                                                                                                                                                                                                                                                                                                                                                                                                                                                                                                                                                                                                                                                                                                                                                                                                                                                                                                                                                                                                                                                                                                                                                                                                                                                                                                                                                                                                                                                                                                                                                                                                                                                                                                                                                                                                                                                                                                                                                                                                                                                                                                                                                                                                                                                                                                                                                                                                                                                                                                                                                                                                                                                                                                                                                                                                                                                                                                                                                                                                                                                                                                                                       |
|--------|---------------------------------------------------------------------------------------------------------------------------------------------------------------------------------------------------------------------------------------------------------------------------------------------------------------------------------------------------------------------------------------------------------------------------------------------------------------------------------------------------------------------------------------------------------------------------------------------------------------------------------------------------------------------------------------------------------------------------------------------------------------------------------------------------------------------------------------------------------------------------------------------------------------------------------------------------------------------------------------------------------------------------------------------------------------------------------------------------------------------------------------------------------------------------------------------------------------------------------------------------------------------------------------------------------------------------------------------------------------------------------------------------------------------------------------------------------------------------------------------------------------------------------------------------------------------------------------------------------------------------------------------------------------------------------------------------------------------------------------------------------------------------------------------------------------------------------------------------------------------------------------------------------------------------------------------------------------------------------------------------------------------------------------------------------------------------------------------------------------------------------------------------------------------------------------------------------------------------------------------------------------------------------------------------------------------------------------------------------------------------------------------------------------------------------------------------------------------------------------------------------------------------------------------------------------------------------------------------------------------------------------------------------------------------------------------------------------------------------------------------------------------------------------------------------------------------------------------------------------------------------------------------------------------------------------------------------------------------------------------------------------------------------------------------------------------------------------------------------------------------------------------------------------------------------------------------------------------------------------------------------------------------------------------------------------------------------------------------------------------------------------------------------------------------------------------------------------------------------------------------------------------------------------------------------------------------------------------------------------------------------------------------------------------------------------------------------------------------------------------------------------------------------------------------------------------------------------------------------------------------------------------------------------------------------------------------------------------------------------------------------------------------------------------------------------------------------------------------------------------------------------------------------------------------------------------------------------------------------------------------------------------------------------------------------------------------------------------------------|
| 9      | MVQSFSGESRFTAQQDRLRPFARRGNAEVLLFIPTDVVQTAHRLRQRFLEDNKADSEKTSAEALALEFLQLFVNTDSREEAEVRFVRLSLVLVQYCYEEVFKNNNVHCADLSRF<br>TSVTAPTILQNWYKATHRLQSQKVAVPKPPSALFEAAGRGTVTLLGALFGGGQPDWLRLRPLRELHATYQPVVEFLRMARKNLNAQAASVEARASCLLYLGLDFMGWLEGGAA<br>LPPDQYLTSAPVNLPLIGVVQLANVYVWMWKSLSRDLRQLPEVQSAFGKAAGHSLGISAVVLSSADEAEFLQNAAGTITLLWIGLRASVAYPAVALDPDVLSDITLANEGKPTPM<br>LSIAKLPISAVQQHVEEINRLVPADRQGLAEVLVNGPRNVVSGPEDSLCGLNMRKLKVLQASKDQSRVPHSKRAVLAFTLLFIQSSAPFHSSVYLTAAMVMAADIRLGRFLPK<br>AAHPVLSTADGTPEFQSDPLDPLTLARLITLVSKVDVWPKSSALPVSHLIDFGPSGSMGLLTHRNKEGTGQVQILAGELTAPAVPLKAAALFDLPHLRWAPNWEEYRPLRLVTA<br>HDGRLHIDTPFSRLVGKPPMLMAGMTPPTTGSTAFVAATVSAGYHVELAGGAYFSEPGIRGAVQNILTRTPAGESITMNLNLFNPLWNLEFFLALKMRKEGIPLNGLTVAAGVP<br>SLDVAADTLDAVHEAGMRHSFKPGAVEAIFTVCSIAERHPDVSILVQWTTGGRAGGHSHFEDVDQILTSYATIRKHRNIIIVAGSGFDAGSVPVYLTEGWSTKYDYPVAMPFP<br>GILMGSRCLMCAEQSGSDGKELAKAEAGVLDKPNWKEKSYDGPVGGVVTLTYLSELEGIPIKTRAGTLFWKELDITKVFSLPEKRLAKLEMKPIYIQLRNLADYKPVWFKPKLNG<br>EQPAEGYCELDWMTYYEIALRLVEVLHYHPHIERWLDVTMRNLTDADWLDRIERFVGGDQRPVLRRAQLDAPQTFLEQFFAQYPAAMTQRVQTADWQHFVHLSRRKTQ<br>KPVPFLIMDFDEFFLWFKKDLTWQSENLAMVPGQDADRVCLIQGPVAAAHSRVNLQPIKELDDIIYEGVRLLDDHYGGGDEGQVPTVEMLGGPPVVASPLPGVPIVAERT<br>DDVQVQLASAGPLGSAEWRFLPAPREANVLQALLTQPHIQRGTRLAPNLRVRLNPHGRQLKVCYTGQMPTGMYDDDDYDDMVDVVDGEISVVKQDQGRDILTLR<br>MLEPLGASAAECVFQFRYVRTCGPNIPIHEVMEDRNARIKQFYSALWFGPGDTGAVDAQADGAPWEIKDLLTCTHKVTRAEITDFCRAVGNVSEHHVDRGQAVLQAPMDFA<br>MVVGWRVIRALFPQCVDGDLFLQLVHLSNGFHYLDDCRPLAEGDEVATRGAITGLTFKDGNGMTVEEATLAREGVDFMTISAFLYRNAQGSDAHAFQYTRDTPVQVQVR<br>DARDVAVLLNKPWIIHFTSDMVAPAGVLTFRSTVRRFGRGLLHVTSVSCETTAKTVVIGTVEFEAEVVGNPVADFLARKGTPLVDTRALPNNGTTSVKAMLSSTSAAP<br>KSNHTYISGDLNPIHVSYPFAALAEPLDPTIVHGMWTSAAVRTFVVQYAAAGNQGRVRRYQVSTGMVPLGDKDLDTLQHVAMNRGARIVRVTNSGSGAVLDEGAEVE<br>QNPTAYMFTGQGSQMPRPMGMDLYETSAARAUVWDQADAHFQSTYGRILDIRVDPNPSTRVHFGGQAGNRVRANYMRLMYKEVKVDPDGTSLKRLRPAITEDTOQTFTEHH<br>EEGLFATQFTQPALTMELAAWYQVQLLEGLVREGSPFAGHSLGEYAAALASVGDVLTIESLVDTFYRGMNTMQNAVPRDALGRSDYGMCAVNPQRVGPVGNQALQYAVDT<br>IASQGGGLEIVNYYNRRPQQVVTTELLNLDLTLVLDTHVKKLDLGEILRQSQSLVQAQLERIVAEACRAQVARRAANGRRVAVQRGVATPILPGDVPFHSLLLPQVAF<br>RECLMEHLSPTNRINVHRLIRRYVPNLTAIIPFSLDRGYFEATLARTNSPKIKAVLKAWNPDPSPAEQQQLGFTLLVELLAYQFASPVLWIDTQDVLREFNATRLVEIGPGPTLVGM<br>AQRTLALKYQADQARNIKRDVLHVHKDSRVVAYLEDKVAASEPAAGSPAPTPAPAPVVAAPAPAVASAPASVPDAMPTEEVHVMMVATLKLKRLGEPVLSSTIKD<br>LAAGKTLQNEILGDKKEFPAYTPGKEELSDRAVAGAVRPAFQNKPGVYTTGLTSLKSLVAKMPGAGLSRMKDYSALSGYGLDPTRSVALLHLALPEAARLGSSEAAGW<br>LDGVVAAYAGYAGVALAKGASAPATAFAAAPAATAAAPAAVAPDRPPTAADFVRVLVALKTKQSPKAVAPTRSIKDFAAGKSTLQNEILGDLQSEVGAVSVGEPAEVS<br>LQGGIPGYKGSAGFASRYQJARMVSSKMMPAGFGLSAQVRDHLASQGFQEGSIAAILHLALALEPPARLGTVAEHWGLRSVVQDYANLHGVSLSAAPAGAVVAVPAVDHSGLT<br>KRLDGLFGEQLELYARILQRDLREGDKRAETQAQQAAALQAVDLVWREHSGYVYAEGISPAFHAKKVRHDSYAWNWAKQDLIELLRISADPAAGMDPTIVSTASILNRSR<br>EAILHYITYETQRTMAKGGREFVELQFGYTLSATLPQFAPMWGLDWQTLATLATSAPPRFVHRQTLPTSTTPTPEGRIVYQEARPGVATFEDYQVSGRFDPPQNSADQ<br>VVAECLRQLRRRPSAKQRRALLQLQASLNVKNSKGRPGVPGVGGRRGPHKESPLLHVQTRSKQNPNAWAYDKALTAYFOELTAATAATTGVCFOKTLVLTJCGGRNSIALEVL<br>QAVLAGGGRRAIVTSSYSKAQCDQFYQAVYQYGGAGSALTVPFNGGSGVDDEALVAYIYDQPGWMDVDDVYVFAAIEQGIEMPIVDGSRSELAHRLMLTNVLRLLGAIRAQK<br>HRRSTITRAPQLVPLSPNHLFGDGYLAEKGLPELHFKWHEGVAITLSLVGAVIGTRTGDLMGADNVLVAGMEALGCTFSTVEMGLFVGLMGTQLRATLSLQTPQL<br>WADLTGGMDRIADLKGHTTLRLRAEIQEAATRSAVLQEMAREDEVVHGKPPAATPTIQRANLQLTFPTLKSFEELQPLRYMQGMVLDQVWVISGFAEVPWGNTRTRW<br>EMEREGFRSLEGCVEAMRLMLGVHFNGLSPGEAYSGWVDAATKAPIADHBEVHKARYESRIELHSGIRLIEPELFNGYDPPNRKFLYLQVQSIDQLKPLESQEEALAFQRQHGD<br>ACEVWAKGDGQWLARLRKGAAMIYPVAKLQFDRLVAGQMPTGDAKRYGLPSSVDQVPTLFTLVSTAEALISQGEFANFEYFHYVHTVEGTVNSGSGFGMVASQGM<br>TNRLEKPIQDILQHEFINTMPAVWNMLLSSSGPIKTVVGACATAAESVAVGVEITQDQKAKIVVGVGDVDEQFEESQEFANMGATSNVDELAHGRTPAEMSRPATITR<br>AGFMEAQAGMQLITTAALAFRMLGLPIYIVAFNTATDREGRSIPAPQGILTSAREKLVPGTSPELAVAFRRKQLDRVRRIKRWADEAEAGLQQVEAEAKAADPAL<br>DEAQYVTERLATLQGRQLRQEAAALATWGNHVFYGNPAIAPLGRALAVWGLTADDDVGSVFHGTQANDNLESEVNVNQMRHLGRTGNLLPVNMQKYLTHGSHKGAA<br>AAMWMLNGVQLYMLDGAVPGNRLNDNVDSLEAEVFLPNRTRLKGLQIKQKGLSGFFGQVGGVVLVHPVDYVLTLSPEYARTILRRAREAAKYCAKTHSDLSLQTPLLRV<br>KTEAPYTPKMQMAVYLDPTARAKYDPEKGSWSFARYEKAAEHPQEVQATQEALRQVAVAPALAEAKGVGCDVQLTADLNLANDTFVQRNFTDAEAIYACRAQPDPOQASFA<br>GRWSAEAVVKAASNRPDPAVWQAGAGPLRAIEVLPSPSHSPRVQLTGALVAAEQGLVREVRVVISHSYGAYIAVAAAL |
| 78     | MPMMGQFLYSPAPQMGAEAEEDRAKKVRLMNSKRYAKRKFGYDQAEQDMPPEHVRVRLDHDGMTNKKFRHDOKRVYLGALKYVPHAVLKLLENMPPMPEWQ<br>VRNCRALYHITGAIITVNEIARVVEPIYIAQWATMWIMMRREKDRRRHFRMRPFPPDDEEPLDYGDNLDLIEPLEPIQMELNDEEDDAVFNWFYDHRPTVEGQKLDGRK<br>WRLSLSIMANYLRYLAGVLLSDLMKKNYFVFDLKSFFTAKALNMAIPGGPKYEPLYRMDMADGEDWNEFDINDINKIIRHQIRTEYQJAFPLYNSRPSVHLQYHYPAALCYIKTD<br>DPDLPAFYDPIVNPPTPAYRDQANPAFDPYTPPEALLEEEDDFELPDFQPFCEFDLDDNTAQGIALYVAPRPNFLRSGRRAIDPLVKTFVQEHQCRPSYPKVRVSYQKL<br>LKCVNLNELHRRPPKALKTKYFLPTLRQTKFFQTTLLDWVAGEFQPMSEMLNLLIHRKNLNYLHDYFNFLPKVPKTLTRTEKRSKRSQIRGLHICREILMRLLVLDVSHVQY<br>RLGNVDAFQLADGLQYIFNHIGLQTMVRYKYRRLMRQIRMCKDLKHLIYYRFNTGPVKGKPGCGFWAPSWRVVWVFLRGLVPLLERWLGNLNLAQFEGRKSKGVAKTVTKQ<br>RMESHYDELELRAAVMQDILDMMHGKVRKNTSILNLHAEAWRCWKANIPVWKGPMVSVENMIIRYVKKHADVFNWVAHYNRERIRRAGVDVKVCKNKLRLTRLY<br>LKAHERHQVLYDKGPYITAEAAVAYITTVHWSLRSKFSPIFPPLSYKHDTLLIALERLKEAYSVKRQSGREELGIEWQADNPHEALSRIKHLTLQRTKEKIEFMDLFS<br>YLIPVYQIEPLEKITDAYLDQYLWYEAADRHLFPNWVKPADSEPPPLLVYKWCQGINNLTDIWNTSNGECVVMVETKLDKYVEKLDFAALLTRLLRLVDHNIADYMTSKNNVV<br>NYKDMNHTNSHGIRLQGFASFIHQYYGLVLDLLGLLTRAIEAGPPQAPNDFLCFRDVNVEIKHPIRLYHRYDIRHMLLKDTHEESKDLIHRLTTEHPDPNNENVYGYNNKKC<br>WRQDRMRMLMKHDVNLGRGVFWDIKMRNLSVSTTVQWEDSFVSYSKDNPNLLAMCGFEVRLPKIRSFINEEFVAKGDVNNVLNOSTKERTAKAQLRVLDDVDSLKKFENR<br>VLDLMSGGGATTTFKIVNKNTVTLIGLMTYYREATVHTQELDLVLKCNKIQTIRIKGLNSKMPSRFFPVYFPTKGLGLGMLSMGHVLIQPSDLKYSKQTEMGVEFFRAG<br>MSHDEQILPNLYRIQVWEAEFIDSQRVWAEYALKRQEANQQNRRLTELEDSWDRGIPINTLFQKDRHRLAYDKGWRARTDFKQYQMTRPNPFWWTNQRHDBGK<br>WNLSNRYRDMIAQLGQGVEGILEHTLFGKYTFPTWEGFLWEKASGFEE SMKYLNTNAQRSGNLQIPNRRFTLVWSPNIRANVYVFGQVQLDTHGMHGLKPLTKISLIQIR<br>AHLWQKVHESIVMDLQGVQDELSDLEIETVQKETHPRKYSKMNSSCADILLFASYKWQVSTPSLDLTDKNYGETSSSTKYVWVDVLRWGDYDSGIFHYTRAKFLDYTTDNI<br>SIYPSPTGLMLGVDLAYNLHSAYGHWFPGMKPLVGQAMAKIMKANPALYVLRIRERKGLQLYSSEPTPEPLSSQNYGELFSNQIIFVFDFTNVYRVTHIKTFEGNLTTPINGA<br>LFVFNPRPTGQLFLVHVSWAGKRLQSLAKWKTAAEEAALIRSLPVEEQPKQIYVMRKGLLDPLEVHLLDFFNIWKGSELQPLFQACIKELGLDLIKATEPQKAMVFNLYND<br>WLKSISYATFSLRIULRSLLHNFBERTQLKQPKDNTVTLPHHWPRTLTDDEWIKVEVALKDUMADYGKNNVNVASTQSEIRDILMIKIQAPSQAQRMIADIEQAKQDQSL<br>TAVTAKTVNKHGEEMLITTTSPYEQNPYSKTDWRVRAISATNLYLRTNHIYVSGSDVDKDSGYTVLPKNVLKKFITIADLRTQIAGYMYGITPADSPMVKEVRCIVMPPQWGS<br>HQAVQLPHHPHDHFLKDMPELGIWHTQPNELPQLSPMDVITHTQLENKLWSDACIHTSFTPGSCSLTAYKSETGLEWGNQHKDNPNTNPQGYMPSHYEVKQMLLSDR<br>FMVPMVPDENSVNRYFQAGHSKMMKYEILTANRPMFYHELHRPSHLNFTSEVNAAPVNDREDDHF                                                                                                                                                                                                                                                                                                                                                                                                                                                                                                                                                                                                                                                                                                                                                                                                                                                                                                                                                                                                                                                                                                                                                                                                                                                                                                                                                                                                                                                                                                                                                                                                                                                                                                                                                                                                                                                                                                                       |
| 97     | MAAAPFTLSMQRALGYNLQPLGAQRASSTSIDMERFTSVEEFVKAMGGSKYIKVVLNANVNGMAATKIRSIIQQWAYETFKDSRAIKFVVMATPEDVTANVEYIKVADCEVE<br>VPGGPNRNNYANVDLIIDQARTKCDAAVVGWGHASENLIPELAKTPIVFLGPASAMARALGDKISSTVVAQSAQVPCIKWGSVSHVLPPTGTVNVDEQLYSQCCVKDLKH<br>CRQAEKVGFGLPMIAKESGEGGKGRIMVMSKMAGEDAYLQCCAEIPGSPIFMLQATGCRHLEVLQGLDLRGLNVTSLKTRDGSVQRRHQKIIIEGPPVLGTGDVGRVLSMEQAA<br>VRVLAKEVYEGVGVTVEYLKEGVGSPFFYLENLPRAGVQVHEPVITMITNINIPASMLMVGGMGILQRMVQDVRRLYGLDITDQDFDLQDEQMPAVCHTIAVRTANPDEGFRP<br>TSGKIYSIDFKPSRTTWGYFSIAAPGGVHEFADSQGFHIFSSGESRIARKGMVVALSRLQRIEGEIRTFEYVMNLLERPEFT                                                                                                                                                                                                                                                                                                                                                                                                                                                                                                                                                                                                                                                                                                                                                                                                                                                                                                                                                                                                                                                                                                                                                                                                                                                                                                                                                                                                                                                                                                                                                                                                                                                                                                                                                                                                                                                                                                                                                                                                                                                                                                                                                                                                                                                                                                                                                                                                                                                                                                                                                                                                                                                                                                                                                                                                                                                                                                                                                                                                                                                                                                                                                                                                                                                                                                                                                                                                                                                                                                                                                                                                                                                                                                                                                                                     |





|      |                                                                                                                                                                                                                                                                                                                                                                                                                                                                                                                                                                                                                                                                                                                                                                                                                                                                                                                                                                                                                                                                                              |
|------|----------------------------------------------------------------------------------------------------------------------------------------------------------------------------------------------------------------------------------------------------------------------------------------------------------------------------------------------------------------------------------------------------------------------------------------------------------------------------------------------------------------------------------------------------------------------------------------------------------------------------------------------------------------------------------------------------------------------------------------------------------------------------------------------------------------------------------------------------------------------------------------------------------------------------------------------------------------------------------------------------------------------------------------------------------------------------------------------|
| 1453 | MAEAPVPVDPKLEELCASIAVAANVVRTLKESEAPEDQLEPAINALMTLKVCLTDLVGVGGHEQALNKSAYKKEKKRLESVTEKPKVKQEFKQGGEGRNSKLAKKMLEKRQTDLQNKTPHGGQKILDEEMAEKEYDPEAVEMAWYAWWEESGYFKPRDADTTSEKFMVPIPPNVNVTGSLHIGHALTCSEDLVTRWRHMRKGHNTLWVPGTDHAGIATQVVVEKQLYKDTKTQRQDLGRDDFLAKVWEWKTAKGDDHIYNQLRLTGASVDWSREAFVTMSDKLSRAVLEAFCLRHERGKIYRDTKLTDWCCTLQSVISKIEVDNVELEGETKLSVPGYDKVDFGFIYFAYPVLVDSEEVIVVATTRPETMLGDTAVAVHPDDPRKHHLHGFKVFKHPFVDRKIPICDILVDMNFGTGAVKITPAHDPNDFACGKRHGLEFIDIMTDTGEMAA CGCGEFSGMKRFDCRAVAMMKRLDEMGLGRGKAPNPMTIPLCSRTGDVLEPRIKPQWYCDCTEMAARAVAAVDAGELRIVPASHEAVWRHWTNINQDWCISRQLWWGHHRI PAYYIDFRGEPAGAKSDVTRWVVGRTLDEVKQRAAEKFGRPVEDLILSDQEDVLDTWFSSSGLFPFSTMGWPDGTVDLQVFFSLETGYDILFVWVARMVMSLELTDRLPFRDVLHNIVRDKYGQKMSKSGNVIDPLWVVYGITLEELHANIASGNLPEKEVEQSAQKAQREQFPEGIAPCGADGLRYALLNCSLSSDINLDINGVVSRCNFCNKIWQATRLSTSNLVGFTPAAPQPMEGCGGERALVLRWLLSRNLHMLTRLVDVAYTVYDFHEVAEAGRAFFWEEFCDVFLEYTKRIFQNPDPHQRAAACETLYTVLETTFRALHPTLPFLTEELWQRLPRRAGVTTPSIMLAEPYAPVAEWTDAAQAEVQMELVLAIAKAMRATKVNYKMAPKATPRVTVRVQAEAGLVRDHVEDFQKLSGVGEVEVAVGDSAPAGYVVTVSE QVDVLMELAGNVDAVAEAVKLEKEKLKLEQTRDKLRAEQED |
| 1597 | MDPHASLLSLTLDKDTSFVDPFRADLKLLQALLSCLVEKAGIPPKVMDFQRLTKAFAKTSPEDFQALVQHAESLTNEEALVTARLFLELIHLSNLAKEHHRLLRRWRAYRRREGAIVLHHTLEDCKISLTDQHGIAPEAVRKQLSAQRIELVLAHTPQAMRRSLLVKFAKILQLEQKDSHFLTPESELIVDEALRRREVFGAWVRTNTRLVKLPKRPDEARSGLSYIEDSLWNAVPKVHKAIDIALHQLDLPLEDLRTITFASWMGGDRDGNPFVTWQVTTETICNLCRYRGADKFYDELEKLLFDLSMHRTCSAEMQEFIAHTEKHAGDSQWDIWWQNHQIAHDEPYRVVLQHLHVKEATRNRKFALYEGGAVSPHILERPYFTTTELKYDPLKMLYRSLHEVGDGIVAEGLLKDTLVRLKTGLELVKLDVQRQESTRHAEAVDAITKYLDLGSFLEWTEEQRCDFLTRELTNKRPLIGADFEASADVVEINTMKMIARVGPDSFGAYISMARTASDVLVCSLLQKVGGIKHPLRVVLPFETKEDLISAPETVEALYRNHYRSHIDDDQEVMLGYSDSAKDAGRITSVWELYKAQERLVKLSADYGVQLTLFHGRGGSVGRGGGPNYLAIQSQPAGTLDGGLRVTIQGEAIEQFFGISTIAEQSLERYCTAVNTLSLAMPPPPPEVFEVRMERLSQSCNTYRALIYENPLFVRYFHDTIPASVLSGMNLGSRPAKRKAGGVEQLRAIPWVFAWTQNRVHPLWVKGVTALRAEMEAAGNKELLQRMVYREWGFFQSTIDLSMVLAKADPQISRLYEEMLVPEPLWFGQHIRDLLAFTTAAMEVMEVTQETFILMNQPVLKRAIDNRMPSLDPLNLVQAVLMKRDRAPDAEADTVLQDALKVTVQGIAAGMQFTG                                                                                                                                           |
| 1731 | PAAPTPTAPSPFPTLDLTAAPPPAPAPVDEAVRGEPAAPLPAPVEPPVTVDVPAASSSGEEGAASPSWYDSEGNLSPLSLSATAVVLLSAAASIFLOAEKPPGTAELETLVVEMQPLRANTRKLTDAAIQKLLDTAEKATNSVVDAETFEKAIGPVVDAVEATLEAIEVQVSADVEATVQAAKVAQAAADVVEKNAELVVAAAQSTDRAGAVAGRMA DVTAAVELATQAVGDEVEIETATQEVTKVARGAVKAIETARLAQDAARDAEVDPOAMKELVASVTSVVVDAADALRAQMEVVDLAAQEAARVAEDAAKTVAENAAAVTEASKASQREERAMVAATSAVSKAADAIGVQAQVAGTAAEETSCLAATAVATTIKQNVDLAATDPAALQEAVESVGTADAVEIEESKVQAVEAAAAQANKATEKAANAVQRNAERVAASAKLGGPGVQSVMQSVSDAVNDAAQAVGDEVAEGAAQDAINAARAASDSITKKMELAAEATRDGSGVAGLQEAEMRSYDVAEAVESQVRMVDLA AQKASQVAQTAADSLEESSARVSATSKQVLNIGEVDAMTVVRSSVSEADTIKSQVQVNTALQQLGKVAWATGWVLLSVAQLLQTAVTNLDPEVFKTVLQVLGYVMGIII EALKVLEKVVVAEMPVIAATNTVLAFYREQVRNVYAALPDPVQQVISADVLAASPLLAYGTGNNAVRAKWRLLYGEGEWVDRPDLRAMLLESOTLLVDIRIPKEALEGVP DLRRGARGKALLSPLPLPLRAKASDPDKLMIYELHAQTVSSMWVSVRFRRAVYVMDRQDQFGKQSFARLLRRKGIGQAYWLRGFGNRWKAAGLVRVPTDVGFTDYVQQEA EALVLDALGLLGSFRPPRPAPEATAAKGSSLRIDPPRPPTQGSRGPPKEGTLGRRTSPPRSPTLGRKAELASPRGSSRVTSRR                                                                                                    |
| 1761 | MPPPPKEPRSPPEQTSPHRLAHYNHVRLPTQASARYTLANTRVEVERRAPCNPAIASVEVRKDATGSRVGIALGSSSPSAAPVVICSGPRVLLWRISGDGPLQQQVNVSAFILN DPSALEAAVVGQGRSLLVHRLTCRAFFFRDVFRRQPMASKALATSANDEAVARFSQQGDHVVIVTTQQNVFVIGPKDFESTQPLTPFICRTGRSFWGLGALFSKPEDIPIHA QWSAEDECLVVVGKNVVEKWRAGAKVSSFALEGDLEFRALQVQADVIHVLVYSGCPKPTATADADAMAEDTDGLKYCVAHYKAGTLEGSTPLKFSYQASKCYVACASARLLPG GSTPQCIVVGLDNLLVTSRDNEDVLYDDFFMFGYVASSSALFLRTSGLWGLKFPAPVEEFAQPEEVPALPVGVTAAANAVAHSKRIVDGSIANPVGWAAAAPVDDASSGL LKAKIARKRAAHRFSMAALCSTKIWDAMSQDRRRVHEHEGKELAMCYALRKFNQDQHVAKGKPGHARQAHAFLAATLEEVVAAADRDLPDSTKMSVQERFFSHASQVQ RLELLSSLRDNPVKVWSDTLQKFGLTPTQTMVFTNTVFLFELFRSLAHRDVGYSQALQDFGRMEWTRLDPFLQLISRQALDTHDIADLAGANVKTSDGGLGATEAIIQRLTSS DAVLLDPAGELLKQADLVYVLEFADDGRASPTAIALVQKYLMEFAGVPRKAVDAGRRRASPLAHVWREPVRALAEKWRLFDMLIELSRTAPEAPPDQMLMQYQLQRFE GEFHTALFQHHLQHKDWRSLLAVEGVDDQPLAEFLDRHNVMAAAVHRLRFARGLEPPAAAELQTSAAALFRDAAQRQLNLRERKASLSMAKLVHLHSTTSPADTNSRLVMH DLNKLKVIKLVQEVLFQPEYLAPEPAIEKLSAAALTAHRQQRQDKLQAALLNQRLDCDEAERTCEKEIWAYIYQAEETDWRQLAQLCRDGISDPMRQHLEGSFCTLR YTPGEGTLTRDMFDHLRKTGRL                          |
| 1863 | MAEPLVLSSEVPLTSTQSSAAFKRFGDEYVRVGGSLAKGGTMTVEESRTFSQTPITTYQSGARAVSNTRILSTGATLLSSATSIVDGSRRYARSSAAVCCQPFDPNCNSVVRQL QTRYLDPVETTHVEKVPMEIEVDVEGYREVIEVPVERIVEVPERIRTVPMQVVEVPVNRHVERLVVVPPELKERQVFIKPTIERVVVKPEVVEYEVVPVQRTVEKVVVPREVLV EVPVDKVTTVDVRVVEKHVPVEHIVERLVEQERVVETQVKVQVIEVPERVVEVPVQLEKQVQVPVERVIERVVPVKRDTQIPVERIHERIVPVQPTNIVEVPV DKLIERVCTVPKQCTVEVQVEKVVDRIVEVPRTITQEVLIDMVVEKVVTVPSEKIIIEVPVEKVVESIVQPKVTVHDVPVEKVIERVVTPHEQRIEPIQRVVERVVPVDRVVER VVEVPHVTVREVPVESVVERVTVPVNVRVVEVPVDRYVDRVVQVPVEKVVNRVVEIPKITREVELQQVIEKIVEIPTTKVVEVPVIRYIEKIVEVPVTREREVPVQKYVVEKIVEIPY ERVVEVQVEVPVERIVEKVVVEVPFTVDRVVEISIEKIEKIEVERRVEVPVEIVEKVVVEKVEIEVPVIEKVVIEKIVEVERRVEVPFDTIVEVERVVEKIVEIPIEVVKNERVV EKTIETSYDVTLPVVEQVSSFSASGGGSYSTSASYSTGGYASGGGGYVSSGGGGYVSSGGGYSSGGGTGGSFAFIGGGSGGSFAFIGGGSGGSFAFIGGGSGGSFAF                                                                                                                                                                                                                                                                      |
| 1888 | ISGGGGSGGSVRTGGFSSSGALPGAAGVTGTTQLYSSQTSLSGSTGAWGLPKQY                                                                                                                                                                                                                                                                                                                                                                                                                                                                                                                                                                                                                                                                                                                                                                                                                                                                                                                                                                                                                                       |
| 1888 | MDGLLKACFCVGGNVNEAATSFAEGVDHEPCLTALEPFLSEIKTAISNKKDNQKCMQCATVIGALTKVVGSAVEPYTIPFLETMLDLCADKQLPVKAAKANCMVVEELCRAS TQWVPIMVNLKGADSGWQTKVAALEMLSALAARPKDLSAVLAIIVPAVSECIMWDTKKEVATVAKDALTKVCAIGNSDIEFPFAPVLSAIANPTFVDCYKLAGLTTFVQVV EAPALSIMVPLIRGFKREKSIPIKRLCSVITDNMVKLVDDPFSTEPFLAQLAPENЕКVMEVSDPECRQVASKTNDTLKRIRDPSKAKASSAADFDATLKAQLDLITEFTLPKVTPIE TSLRWIATSACGLINNKFYHESWTAAVLPNLGAFIDHHCPSDAQKINEAFLEKCVKEAPKEADLDDEEGEDLDCDFSLAYGNKILLNQTKLRLKRGQRYGLCGPNDCGKST LMRSIANGQVEGFPQDVLTSVYLESDIPAEADYNVIEFVRLDPLHKDKDMDEIIPMLKSVDFTDQMLNGPVYQLSGGWRMKLALSRAILRGADILLDEPTNHLDRNVNA WYENILINKDVTVPVAVSHSAGFLDRVCTNIIHFNGKLKKYRGNLSAFIKHPEAKAYELKAVGSLKFRFPDPGYLEGVKSKNALLMRNVGFTYPTGTRKLTGVSIFFVLSVR VAVVGPNGAGKSTMIKLLCGELVPQEGTVEKHPNMRLAYVAQHAFHHIENHLEKTPNQYVQWRFAGNEDREAIVKATLELTKEEECKCKPILWDGKKRAERLVSRRKQVKK SYEYEVKWEGPSYPTENSFLSKDMLMQGLGFDKLMQVRDEREAQSQAGFNRPLTQVNIKEHYTDVGLEVEYSVHSQIRALSGGQKQVVKVLGAAVWMNPHIILDEPTNYLDRES LGALADPQSGILLVSHHLDFTTALCSEKWVVVDNQGQLQAIGSPDEYFGKEAGDYDQGGEDTGAGNVVKVDKTKNLTNRKEKMARKAKADAA                                                        |
| 2012 | MAAGTGAQQCPSVGRPRPSTALHLHAGLDTGLPVVEALAQVQRTIGGAAPPLAQEGFSIPTFTGEDVLPTVASLAYLYARPGVITGAFDTVAAAPMYRMQMKKLDPKKI EIGRKLGGSGGFGEYVILASVKDEDSGREVTIVLKRVEKFEGAETWMNERINRALPGVCARMVDSFEIKPTGDKPKSSGVFGLSGGKELWLAFDYEGEKNLAEQMPEPNPFNLE QLLFGRRLLNGPKSPERKIQTIREIMRQLVFLVSSLHNIGIVHRDVKPQNCIVTFDGRLLKLDLGGAAADLTGINYAPKQYIIDPRFAPPETMVMQQSTPAPPIAVATFLAPALWIL NTPDKFDVYSLGVTFLFQFCAGMRSNDILAFNDTLKDSFKYDLQAWRESEAKNRQDYLDGFAALLDLONGAGWDLKLRMQFNPRDRPSTTDILRSAFMKGTTLTAPMK S RGVVDRALEVNVNLVQLVQYSRYTRTPTDQIQEGTVLNVEDGQAVPSPDDVSRQTQWWEGRKRAVTIATRPPTLMERLSDQMMPKRSK                                                                                                                                                                                                                                                                                                                                                                                                                                                                                                                               |
| 2212 | LDARSEEHFLQSAETANLEALLRVQRKQDGLRREESRQQLWLAENIEPDEMYTGPRISSDPVTEELHALYNIHKTTPDDCVHPFYMLRLLSAAKKQFSGLPRVTEVVHTDGPV VTFVVVGDLHGSLQQLDILLIYDRHGLPGGRCLMYLNFQDGVDRGPYSVEITILLAFKLVYPGSHVLRNGNHEDMLINQRYGFCDEVLDRGFSLHMNFEDQLWMLPIAATV GLALVHVGGLFRLEGVTLKHLKAIPRGPCNLQPRNFQETIMVDLLWSDPCEEPGHQMLLRGGNTIRFGADVTHRFLRAQLMKLIRSHEVPHTNKGFOVTVHNGRLVTVFSAS NYCGHGRNNSGAVMVFRDLKYTFHEHWAPSLESFRVVRTSPKRPNSEIQSAEVKLDVLRQVKLVVENKTDLQWFWNREDTTGSGSVPIDTWHRGMNVVNLISLNPWEKY EDFLIKKCMSTPDTVHYGRFLQQFQVRVKPEFAKWKEYVVKVQVHDALVQADNLNADMMVEVFDQNNNDGYVDVDELSRVFRRIEIDVTKDQIEELLADIVICGGQVDVIALIESMQ IKRYANLDPQSKKIIDIYDGLIGQEASETVRLFENIDENQDGRQLQHHEFINVVQRLLVEDMAKAGKPNCEPVESEMLVQTVQAIDANNSGSIDFMEFVDVFRHRQSSMDRLLEQI CRVFYKYQDLSLFRFAQYMDVNGDGLVLTPEEFDAGLMTFNALVSEPLSASTMDAVVKYIDRNSDGFISYQEFCSAFYVDSSTDVTEPMKQGHRRRFSKPADTLPKSVLERRAS KGNLPHQFPDQKATSSQPPAPQ                                                                                                                                                                                                                                        |
| 2357 | MSPSSLHITTKPHSIVSSSLKPASGGFEQEDSGRFANLNLQMPMQQAKAHLQVQHSAEERSLASSWTPVVSLLTALGGAFAFMAHLRHRADSQIAIAPFFGIVQPTNQTADV RSSSSSTKTDKGADSSSDMDRETERHRIDQRVVFNAERWRKHGRIGDRYGRAGVTTLQSYVVRHLVWPVFGISLFAAGVCAAQLAYGVDDQFSLPTSLSLSAPTLLGLLVFRTN ASYERWDGARKMIGLVKNRSEDLTRQVCLRFPADRTDLKEQMMYRIHAFFFAFKVHLRSRGGGGFEDDSNLIEDLTPVLKSKELELLKATNRPAAHVMMHCTMEVKAALLEGAA LYCLDQNITQADVLGGCERILRTPILSYTRMLTRFLLVLLLLPLALSVEVLKDHSIWLTIPAVSFISFALLGIEEAVAQJEEFPSILPMEAYAEQSRNRTTIFDQMAAIVASMNIV EKAAPPSLPSSPVQAEPAKPVLAVAATAVAVTAAPAVATTAATAAAPPSPAPAKAEPSTAKGRVATAVAVVQEVTAQVEAVVEQHAVVSEHAASGQ HEAARKSVVHVAAAPAEPLPVPVSQPAQKAESSNIARIYEPSPEKVVLELQRGNGRFWMGVSERNEMNAMERRSLIVAQYPKVCILSCSDSRVPVEIIFDQGLGDVFVVRM AGNVLNASAGSIEYAVKFLGVKVLVIGHEGCGAVKGAITMSPTDIAKEPSDLQEVLSRISADLDVKALDDISDVRAREREAINVNTMNQVQRLQSNPLIAPQVEKQQLLVVG AFYEISSGIVDFSLDKNGFLVDV                                                                                                                                                                                                                                                        |
| 2385 | PARNQIAKNPNTVYDAKRLIGRKFKDEVEQNDLKTWPFQVQVAGDNGDPCFQVQHCQTQQMRPEQISGLILAKLKETAEAHLGKQVRKAVVTVPAYFNDQAQRTSTKVAG ELAGLEVALRIEPTAAALAYGLDRKTDKSQLVFLVDLGGGTFDASIAMDSGVFEVKATSGNTHLGGQDFDDNLVYKIQEFKAKATHLDMSENAKAVKRLTAVEKAKRALSS ITTEIEVDIAIHEGEDLLVKVSRAKFEQLNLKLFQCIKEIDKVLTDASVKPADVDEVVMVGSSSRIPKVQEMVAEYFGKRLNFSINPDEAIYAGAAIQANVIAGSAEAKAHTGDV LLLDVAPLSIGLAADGGKFVLIIPRNATIPRKVSEFTTVDDQTCVEVEVYGERPRASANHLGTfeldGIGKAPAGEASIMVTNFNDANGVLNVTAEDSSSPGGKKAIEITIN TNKLSDDQINAMVEAAKKFARDQDAFVKLATARAKYEELYDLQKLAEREVEKESLARALEAQAEWQEQQLLEAASYEDIQDKMDQLVEIHRQRMLETKEERAKRRAEQDGELE                                                                                                                                                                                                                                                                                                                                                                                                                                                                                                        |



|      |                                                                                                                                                                                                                                                                                                                                                                                                                                                                                                                                                                                                                                                                                                                                                                                                                       |
|------|-----------------------------------------------------------------------------------------------------------------------------------------------------------------------------------------------------------------------------------------------------------------------------------------------------------------------------------------------------------------------------------------------------------------------------------------------------------------------------------------------------------------------------------------------------------------------------------------------------------------------------------------------------------------------------------------------------------------------------------------------------------------------------------------------------------------------|
|      | ETTQGPQVSLQFNQVMNYIEVGKKEGAKCLFGGERQQGSKGYFIQPTAFVDVQDGMRIWTEEIFGPVMAIAKFRTMDEAISRANTYVYGLAAAVWTKDLGTAQYMQRRL<br>RAGTVWINCYNVFDANMAFGGYKSSGIGRELAQYALENYTEVKVQCVKSAPRF                                                                                                                                                                                                                                                                                                                                                                                                                                                                                                                                                                                                                                                |
| 123  | MAAEPOTDSALKRRKKKAKPIIPSLEGAEEADPESAPPLAGRARPRKRAQQPDAPAGARPAKRRRPPPPPEESGSDDDADILAEAEAEALRAEGVQIHGDQQRCRPRWAKQDI<br>AMDTIKRRSEDDTTKVFYARCLNITEHHLYDHYKNLGAEAIDIKWGGQGRADLGSQFKGWAILTFKSTSLAMQAAAMKPPQVNGQELVVRWMGYQLDAKRPSQLLLEM<br>RRKREAIDEELGVKKGTGAWKDOWLQGRTPPPVEWTEGLADKAFFERDYFSTCVYKINRPAEDVQKWIQSNIAISVPADSSPPMIEFSEVDGEEVYNKVLRYKRRSPFPQIS<br>WPIILKGRDCIGLQSGTKLAYALPAIVHLNAQPRPTAAEGPVVVLVAPTRELIUIQCNDELGAQYQAMAGGLRIGLAYGSDGGAADRTQANVLGRGVDIVGGTGRILCDFVEA<br>KILPLGRVSFLVIDEADALLEMGFIDQTSALVMQTRPDRQTMFVSATWVRDVHMAETAULTDPIKLVVGSNKEKAVEANRDVEQRVVIVDCMKDKLELLTTTVQQLKQKSPA<br>SHRTLTVFGQKFVAPVSKHLLPRFGKNVYITITGDLHQTVRENIIRFRDRDPGILVATDLVARGLDIKDLRCVVNFQLPRDIDQYVHRIGRTGRAGEKGMVAFSFCRFSFPMDC<br>RLAQDIIDCIRRAGQQPPNELLQYADGVTAADGQKGRKKRRVEGGKGEKDPPEEDAEGDRWGPDPNPTERLLSPVPHITATPAAAWTPAAATP |
| 4401 | MSAMLGLLEVQSHITGKSPLTNLGDHLSPPFTANILTTGGGSVAMFSTSGKVDRLPWFPGGYAPSVLTGQYFGDRGDFPAGLAADPKVFERMIRVSEVYHGRLAMLAIVGAVVP<br>DILGKGAWYEEAQNAGIGVNEVAVFTAAYGVVEVARGLKANSDPTKNYPGDFPLKLTDDTYKEAIKNGRLALTGMGLLEVQRHVTGSPLNLVHEVHKPLHNHIAESVMH<br>QWPVAMFAATGHKDGWVFPGAQPPAHLTGEYPADRGDFPLSLAADPTVYARMRVSEVFHARLSMLAIVGSIVPELLGKGAWFEVGNISVDGIKLGIFILMAIAAAPTEYWRGN<br>GGFNWDKGTADRSYPGDFPLKLTDDTYKAAEIKNGRLAMTLLGLTFFQYLATGESPLANLAHLANPVGANITTTLAMYSTSGEKYRGLWFPNITPAYLTGEFPADRGDFPA<br>GLAADPKVYERMVRAEVFNGLRLAMLAIVGCVPYPELLNGNVWFEVWNKVDFYRFALISQVVAPLEYWRGNGGFGWDGEEKYDRSYPGDFPCNLTEYTKAAEIKNGRLAMI<br>GMFGLVQNHVTAQGPVANLIEHLRHPLAANIGANLAHPWPPVAMFATTGHKDGWVFPGAQPPAHLTGEYPADRGDFPLSLAADPT                                                                                                                               |
| 4567 | MAGIGGLQGSRSISLISKEIRYEGFLYSINPDENTVALNRVMFGTEGRKKEGPQIPADQLYEIIFRGSIDIKLTVDFADVQKQTAQPPDPAILNAWQAPSAPSAPSSGWQGGP<br>ITFASRGPPRDEYLGAPAPRGPPRRDRYGYDQDRYGYDRDRDRDNRWDDRRDRDRDGVYGGRRDRDQRYGGGRDYQDRGWQPRGGYNDRGSYGARYNDRGSYGGPD<br>RRDRDWEPPRGKGAGRRDRDRRSGKDDRRGGGKDDRRTGKEDRQPAKGDRQRGKDDRRPAKDKQKEGRPERPEGKKPRSESVRSNADQHTGRNFKVDSDGA<br>KQYAEFNFENLKKDLTKVAQEFQEKASESETAEDKKVKLQFTAAGKGVYNKEESSFDDQISCEALERKITGPEPKVDKELREQQQLDRETFGEAGAGFGYGYPRAGFRGRK<br>QRSNFKTGGGGAGGYSNY                                                                                                                                                                                                                                                                                                                                     |
| 4707 | MLRISQACLLGLVWGGNGALQPTVEVEVTAAGRGGPVILHGVPPPAQDSALLADSLAAASPLRLVEARPANACTALALSPPPRGPFVAVVQRGCEFGKLILNAERAGASAVLI<br>TESLTTLYNFSSGEPRLQASEGGPCLLRCDLGEGEVPLSTPKADILKGLAGSTCAQSERCPSHMCGVSGEQVGDYSRACCLPDRYVMMDLGNRTARRPAIPAFLGASAAATDLE<br>RALRGGGPVVIRVADAGAGLGLVLGAFILVWLGCSEALSTWLSAQEEREVWATGGGAGAGEKRGHQHEEPVVMVTETAMGYLLVATVGLVGLLLVQQSARVVVFM<br>VPRSIRATLNRYDSDGDDARILRVSQKSDAKTVATSIQTRMRLDGSVYKQAVGASVNVQAVKAIAIARRGLDDTLRTDLACYPEFIHIPAPNPGDGRSALRWTLFELSQRGRDR<br>ERDRDYERYDRDRDRGYGRDYDRDYDDRRDRDRDRPRERERERERSDRDRDRDRDRDKDRERDRDRDRREKDRDRDRDRRPAREDRRADRLDVLREPPYRADA<br>EESKVKELKVAATSDAKAVAGAITLRLRNGDPVRITVMGPSSINQLVKALAVARTYLVEDHADMAVYAYFIHRLGSSDDEPERSALQITVYLTHEHKFDDEEQTAEFKVAGATNP<br>KSTAGIANGIRGSKPCLALGPKAVGQAIKAIAGRANLEQDKTDIFFVQFQTRRMMLSNGRRSALELLVLPVAPKS                           |
| 4779 | MAYDRERDSEPRDRDRKERPRDRDRDVTPILRVAGSSEAKNMATAIERRILDFAVAKLEAVGAASVNAQAASIAIARSHLEAEGKSLAVHPEFIHIPHSKEEGQDGRSAMQYVVF<br>AVPRSRTLRVYDDDDARILRVSQKSDAKTVATSIQTRMRLDGSVYKQAVGASVNVQAVKAIAIARRGLDDTLRTDLACYPEFIHIPAPNPGDGRSALRWTLFELSQRGRDR<br>ERDRDYERYDRDRDRGYGRDYDRDYDDRRDRDRDRPRERERERERSDRDRDRDRDRDKDRERDRDRDRREKDRDRDRDRRPAREDRRADRLDVLREPPYRADA<br>EESKVKELKVAATSDAKAVAGAITLRLRNGDPVRITVMGPSSINQLVKALAVARTYLVEDHADMAVYAYFIHRLGSSDDEPERSALQITVYLTHEHKFDDEEQTAEFKVAGATNP<br>KSTAGIANGIRGSKPCLALGPKAVGQAIKAIAGRANLEQDKTDIFFVQFQTRRMMLSNGRRSALELLVLPVAPKS                                                                                                                                                                                                                                                               |
| 5030 | MRPAAPRESSPLPVGWEKKWDEKHRRYYYINHIDKSTTWTAPPPPPVVAAPPPRLVPEYKPPPPAPAPSSGFTANVSAPAATYTPTPPRPAFAGRKRPRGPPREPPVPVREP<br>PVQEPAPGSIHSEVFSQRGPVTRNPALSLNEMKANIPENPKALLHPDVQKGLDYFLAHGPGFGREDVDQRFIDILADVPPIRAINCLEYVLSNSDNTGVKNPSAYLVTMLKKREFP<br>PPLHVDLTPPLLVEPVQALVDNICIYEVLRREDFTQLLVEQLSLLGAYGAKALCDFLAADLRVHRPALLQAIVNVYCEEYLVPAKGAADKTRRPPRPVSRPPRIEPIYSEREP<br>QRTWTAPHGDEREHQPPHQAHTNAAAMPTEPPTYQTLHPGVPQARLDTLFQAQRLMLEEVDVEAIAQIASLPPMVGFNLQQLFRESQIDKQIAKARVRNIIQERGPQKV<br>VEVDLDQVAEEAAALPYEVQVKLDECFEKEVLIHQDVQVEVIERLGRLEATALDALGRLLAGEAIEPNRSTRLLIIDAVIDPEGANPEGYSQVEQPPSYTPTTAATPAQGG<br>GKPDKRRQLVYTKLPQPPNADFIRAVFNDFTGVTVDDVKVVGGAFFRYETHEECQAIRALHNITILEGATEPLQLLLT                                                                                                                                   |
| 5198 | MEILKDFATTLRLARTTSPAFRETCSRVLTLAAELEAEQRENVVSLUSQVSTSKCEDVKLAAWVRLLDQIVTVVGRGYLPGFGEHLPHLARYSLPPTPEYSSVVYGWELKRLFPRETI<br>ESIRKGLESFGFKLEEFSEKSEAPAAAGPRAPQPTTEAPPAHGWKEHVSADGKKYYHNARTGESVWERPAEMDAVPQPSAPAPRPVAPVAAAVGSAGAWQELLHSSGRRYY<br>FNAVYTQERTWQRPPEMDGPAGQPGPPATAAAAAAPSVPTPTTAAPTAPQDVWVEGVSPQGVKYFNKVTKVSTWDRPAELDRPPPPKPEAPAPSVWQECTAPSG<br>DKYWYNPVTKVSTWERPAELAAAAAPVAPVAAVAPAAPQTPAAMVAAAPTAPAPSAALAKASMWQEARSQDIPYWYNRETQVSTWQEPPEVAAVRGTPATAWQE<br>GVSPQGIKYWYNRDKTKVSTWERPPELGEPEVATPTPVSAQPAIAQPAVYAQQPASPIPTAQPDATDPDKRRRVDAAPAAVEPAAALAAQPPAQVGPVPLHAHIPPGV<br>PMQGGPMHAHLNYPYAAHQHMAHLAANGYAAHAHYLWPMPPGAAMYPPMPMGPPGPHPHHHHQQHFFRGGPPGPHHHHHHQQHQQHHHQQHFPFHMAHQHH<br>HHHQHLPPGPVATAPNPQTRPPFAGPGQPSRGPPTPTPT                                                                                 |
| 5340 | MTLAGSLCGDADDCSTLLELDPAKRTTHASSFSGADITVTSPEPGPSCAVLALVCHHQSSLRLVNDTIPAHRELLDKAPFALVTVPKSSSPTPAGPDKATAFIAELLQTVV<br>GALAATEGFEGHLYVHDGPTGQLLQTLGAALASPRLLWSRRQQALTPRGTAMLHRAFWLFDADRDGELNDVELRSLAAAFYGRADEDVVALKSLVTTASHGLRSFAFLS<br>LCEALLAQDKVEEYVWQMLHSTGLDSTGQPSGVKDLSWLHPKPKHVKLYEPSIAQRFLEELFLHGFPKRKPADPWPGWAVVPGGVPGPIADPWYPDRPAPVAPFRAGWD<br>DAQADTFLAHWSYRCLADPETLIRYCYWGYTGQAQDLVPHGRGGPKHAAKSVIQLVLGGSKAGKTSLIQHLAGKRLPDLQIYRPTRRPLACITGKSFSEGEKESTRATVY<br>FELVEDVNAFITDEKQMRITDVLMLYDGSDPYSFSYLQTKRQKMLACGTGRMPFIYVMTKCDLPRANQLGCRPQEFVRSQLQSWPPVFSVAGDPRRTSGPLSNEIAMLA<br>EFIVETARHPCECATAMLEESGEWRRLLPLAAVVALGAASLALWLVRRRGALR                                                                                                                                                                         |
| 5712 | MNLLNRDEEEELAPFEGIDKAGALHESKSFNAQSLDPKKCKGTLIKILYLLSMGESLATTEATELFFNTTKLQSQDATLRLRYVIMVKELSTCAEHVFVASNTLCKDMNSTNDMY<br>KANSIRALRKITDSSMLGPVERYLQAQVVDKSDIVSSAAIVTGIHLSMTHPELVKRWVSGVEVGAELKQRGVMAQYHALALLHKRLKNDLSVKFGRVNTLRPSPMALLCIRM<br>CAEVLKEDFDGSPDLSQFVVVNSLKHSEMMVFEAAKICSLKTASSKDLTPAILVLQLYLTSHPKVLRFVAVRLLNKVATTQPLAVTTCNIDMESLISDPNRNIATLAITLLKTGSEF<br>SIDRLMKQINTFINDIADEFKIVVIDAMKLLCVKFPKHKNVLLTFLSDALRDEGGFEFFKAIVDAIIKIIDTIPQAKEEGLHLCEFIEDCEFTMLSQRVLHLLGQLGPTTSPNPHKYR<br>YNRVILETPAVRAASVSALAKFAGLCPPLRQSIQVLLQRVMDQNDNEVDVRVAFVYTSVLDGKEEDVQTFIMDVATNTESRRSKMLKEVDDDEVPLPLAEDGAAGEGATAAAAP<br>GAVEQVQVRSKHQIEKAVKALLAHPKLLKGRPHKTSPEHITDESEFVYTLKHAHYVFEFVRHNNMDDVLENYT                                                                                                                         |
| 5897 | MPDDNGEPPPAINWSLLDDQEWRRREGSKSAPKLNVSAPFVPDNLFFDFGQKQAGDGEFIRNGPEKGTGNPPLNAAFHDFINSVTKLTDSEATPSQSLSQSSFSVPNT<br>TNASFTSLLKLSGSGQPSRLEKDRRGVPFALVPDSPAMQPADGGALPIRIPFGTSPQSQSLLGTTPASLASLGGEPYFVNNSPSVGGGLMSGTTLAQPASWPRPAFEG<br>QAGKPKKEAVMKPNKQRLTFQDSKEQPIGQLPKGKATTEMAQGNLSRQPVPADATRQGLHHKDGRRGVKGAAGATVERRRLLPALEGEIDHGLSSLDEVIGNIYPTAKDQY<br>GCRFLQKMLEDGSPQHLQQLIEEVYDHCIELMTDPFGNYLMQKLVYCNDEQRTIIAQKVAPQLVNLISNMHGTTRAVQTLIEHLSNPVQVQIIGAFAQSVVPLIKDLNGNHVI<br>QRCLQKFSALDKQFIYDAAIPRCMDVATHRHGCCVIQRCIDHASEDQRAYLTDEIARNAFSLVTDPFGNVYVQYVLDLNDMQMIRKICSSFISFGAGLCMNKFSNVMEKCLQ<br>LAPDDIQHEFIAELMDPSILPKLLQDQYANYVQATLTVSKPHQFGQLQEAIRAHLLVRNTPYGKKIENKLNRGAGRGGGGGGGGSGRGNRAGG                                                                                                                             |
| 5947 | TTVLLFAVQAERAAAHARETSAALDSKNGIGKGGDSGHVQYGECKLTKCKDNVLDKVMRSVKGTVQRPRTLGTENTAKANYSLDFDALVATLESRADPPNDALISFCARLM<br>PHTQVAHQIQDVTQAMLLFEAAAGNVLDKCFNEPGKGDDQVEMDIAQIRVLLRAEDCLKVAHSRWGREGTTGVSMMLAEARIAFGDSREILLEALDNVRSILIPKAVFPQ<br>GLEDITSIKKMTLEAVMEQVQAEERLRLVVSQVAKGTAIKAAEAKNRNDILALVSLRQKHEDLSERWLKTIVQRVPYGAAGDNTQGAEQVSRDINKRLIAAMIERLPRGGD<br>SASLVYSAQKLVEMFRMFKMIDAVQAATKLFEDVCMDDMYHELAQOGPYSKDLPLLIYADDVDVRAMLTDVIFLANKLUISEYNIRAARDQDPRLPRLVDRGSTISQGEIRGRI<br>REILVGAEIAGQYRLDTYIMAGGFGHGWGRGTDLTGTREVFVKTFKSEEEFGSGAETVAKMVVEELETAEVVMKVQRLMKHPNVSVLVKVRNATIIVPSTRQQGDGCFHGI<br>EYCDGGELFNIVLPKESGGQGCACFNEKQARFLFKIIDLILLVHLHPKEGEGEPYHGDIDQDNFVVSGSTKLIDYGTLSKVSNDVGPVKHMTTRSHQQPFH                                                                                                                |
| 6083 | MAVLWHWSATPVITRHDLQLQHPGVVAQARGLQQIGGRHPRTRPPVLAQAQRHTITSEDKGIAPLPFPDRVQTTWRRLFGVAAVAAVAAAGLIGITVALNKRTPRTYCC<br>MVAAADVESPPSTTRSKKEKRAEEGDDPDSEGPAYQFPLPPTYPNFGWQTEVGPAGGQARLGLLTPHGAVETPAFICATKANIKGLPDMVRDAGTQILSNTHYL<br>MLQPGSPLVRKLGGLQTVTGWRGPMLTDSGGYQIFSMDGYSVSSEIKQORGAAGFSTPTVQRITEEGARFRSYVDGSPQDLTPESSIVIQRELGADLILVDECTPFHVDKAYT<br>ARAMRRSHRWAVRSLTEFAAHDGDTQALYGIQGGVHEDLRAESAVFVNRQCFPFFTAIGSGLGADRATMHAVVGYTAARCRDPRPIHLGIGGIRIDIFHVGRCGIDTDFDCVH<br>PTRLGRHGGALQARYWDEEQPESRVTRHEIHLKARFRDDIRPIDSTGCYTRCFNGLYHLHLRAQETLGGTASLHNVVYVNRMMMAAIRVAIRNGTLAQEEAVVWVHPR<br>LYDRNPQEQEQEQEQREERQRRQAQKERRIAEQQLARRSPAPAAADTHACTDTDGAPGNPCSPPTDDGSEEQG                                                                                                                                                      |
| 6113 | MTKLAVAAEVRKLSLENGSLKELLGQQTATKTFKQGYGLWKEVLDFGAAYEKMWWKAWGGQPVPLDAFLMQKKTAFIPVKLNPPLCLDRCSQRPQAYGCPGLGLEICAER<br>HFVCEQCYKAGYTVHQIIGGKSREYVLAVLRAAFKQSDADFSGSDIFLEGHIFVLASRPDIPEGRRAVYVNLQTLKVAFDAYAANDRVDLADATLRLFREIHIDPPNLDALFA<br>SHTNVKAAASFAQLWITVYHGHDPDSKHTKLLKAEKQLFKREPTVKEYEADDSDVKSVPDYTHAKSKILKMLGEGGLSMAYSLDIDYDGTADIAVAKYPSGLSYSEKANMFSAA<br>RLQGTVSHRNVLRLVGVHDSSAWPCILLEAEGGDLAAWQGEVDRRLQWKALHEVALGNLQHTSNPPIHRDLKAPNVFVNKKGCTCKVADFDAKLEPPLYLTSIGIMGT<br>PGFMAPEMLANQFVYGKADVYSFGSLAYEVTHGAVPFGEVLEQYPFMDMEGWFWQYISTLTQSGKRPADVARNVTPGMCRLIVSCWRANPDRDRPSMAEVVKLEEIRSEYS<br>L                                                                                                                                                                                                                     |



|       |                                                                                                                                                                                                                                                                                                                                                                                                                                                                                                                                                                     |
|-------|---------------------------------------------------------------------------------------------------------------------------------------------------------------------------------------------------------------------------------------------------------------------------------------------------------------------------------------------------------------------------------------------------------------------------------------------------------------------------------------------------------------------------------------------------------------------|
| 8570  | MASKNTYILFELASGFALFHCKEMVQIEQLTNESTVACQDFGRFKSMVGLVSFAPFTTADMAIENINAVVQGVTPFLSDFLKLQLGGSKKEKAELGVADVQLGQTKTSTMQI<br>NCVANDTIFEMSRWIRFHIAKFIPELKEADIQQAQLGLAHSFRTLKVMNVRSDNMIQAISSLDDQMDKINTFAMRVKEWYGVWHFPEMKKLIQDNEVYCKVCVVVKDRK<br>NLTDPAVVQKVADIVGDDEDNAAEIARTSAISMGMDFTEADFLNIETFASRVVNLTAFRKSVYTYLTKEMNVVAPNLAALMGEGQGGRLICQAGSLTNLAKYPASTYQILGAEKA<br>LFRALKNKTNTPKYGLFIHSPYIGKAPKEHKGRISRYLANKASIASRLDRFMDPENRVFGQILAQQVEDRLVHLETGKEVETNEQVMKEKAMVAYADSLGKKLKKRKAEEAGVA<br>EEADDGKKRRKEEKAKKAAAEAAANGAAAEAAAGKKEKKKAKGE                                      |
| 8816  | KVSKGNPVPVWKEAVRGVRIPAGVQYITINVWDEDPGKDDFMGTHTRLSLPPPDGDTWLPPLHARENEPKDAKLAKGNLGVINLRVKCRQGRDLSAYVPPSPSPSPSKAGVA<br>TLDLEVIEGRDLVDLDIIGKSDPYVQFCWGTDPKPFYTTKVSKGKNPVWREGVKGLRIPDGTQFISLLVWDEDPGKDDFMGVHRLRVPPNGDMWLKLYPRENEPQDAKL<br>KKGNLGEINIRVKCTGVRRGSGPLPMPPELSLTGPVPTRCRVTLIGAEG LAPADSNGLSDPYATISVGYEIASKEHKTSAKKKTLPNIWNETFDLHVPENETHLTFNVWDDDKLS<br>KDDFLGQAGLDVRGPMRQNGAFAFLPLRPRANNADDQKLVEHGGGLKIRFKTEWVGLPTTVPASPFTQASSQTSVPPSPAHPAPIRPPSEVVAAPPAPKAPPPAPKPA<br>PPSPPKPVEPPAQTFEEVSVW                                                                  |
| 8825  | MAWPAGRFAPLARALRRYSTTTAPLSEKQAQFLADFRQRLAAAAHEEGSGSVSEEEKYPLRPTDGPSSLRRQLRDQRLPMPWSVLQKKKPGGDNYGRIKAQLDKKIATICQEG<br>RCPNIGECWGGGEGAVATATIMLLGDTCTRACRFCSVKTSRAPPPPNPEETAQAIASWGVYIVLTMVDRDDLDADGSAHVETIQAIRKATEGRLVECLSGDYAGNR<br>DSIARVARSDLDVYAHNIETVERLTPQVRDRRAAYRQSLATLEYAKAVVPLVTKSSIMLVGENDDDIRQAMRDLRAAGVDCLTGLQYLQPDQRQRMKVARYVPPEFDAW<br>RAEGEGLGFKYVASGPFVRSSYRAGEFFIKNIVNSARAVSS                                                                                                                                                                       |
| 9045  | LDLGGAAPLGTRLPVQARTPPVLAALPPTPWLPVSGAALPQLQSSGPLLTHPDLARPAPTPGPGWAAALGTAGAMAAALLAVVGHQAHRGPELERSPSVVALAVTGSASAPAV<br>EPPEAHHIPPLFNKTPHSADIRLHFYDDALQAVQRAISAGESRMEVRTTFPELNSETDYVRAATMLEMVRHIATALATEGKRVKICVQQSGLQGIGFSGPLSLNGMMMLAKLKM<br>DWDEEAVGDRFSGVEVGAGQVESTVDVYLLISQPNITGCSIVELLQGMKAANGKPIVLINPKLDDIPSSGGVMSYRGREERMEFVATFRTVYHFRLLYRKPYLYPIYGALRMAY<br>GGPWAVYKRIETGAAPDLQEEYRFSRSPSEPDSGKIMDAVFGSSSSAVYLS                                                                                                                                                |
| 9049  | LDLGGAAPLGTRLPVQARTPPVLAALPPTPWLPVSGAALPQLQSSGPLLTHPDLARPAPTPGPGWAAALGTAGAMAAALLAVVGHQAHRGPELERSPSVVALAVTGSASAPAV<br>EPPEAHHIPPLFNKTPHSADIRLHFYDDALQAVQRAISAGESRMEVRTTFPELNSETDYVRAATMLEMVRHIATALATEGKRVKICVQQSGLQGIGFSGPLSLNGMMMLAKLKM<br>DWDEEAVGDRFSGVEVGAGQVESTVDVYLLISQPNITGCSIVELLQGMKAANGKPIVLINPKLDDIPSSGGVMSYRGREERMEFVATFRTVYHFRLLYRKPYLYPIYGALRMAY<br>GGPWAVYKRIETGAAPDLQEEYRFSRSPSEPDSGKIMDAVFGSSSSAVYLS                                                                                                                                                |
| 9215  | MATIPKLRQYPPVRSATSPSRVERVSYGAAAPSPARVHVSPSRVSEGRTYVSGPPRDVPYETVVVGGPRRQCVTTAGGLQHTHEELVAVVPPTPVEVLHYQVVEVPRTVEVDK<br>PVVAVQERIVEVPTREVEECIVEKVIRTVEVPVEKIVERIVEVPVDRIVERIVEKVVVPRDKYVDRIVERIVEVPVEVPFDRIVERIVEVPVEVIERIVERIVEPIQVPVDRIVEKI<br>VHTVQEVVVEVSERVVEPRELTDKVVQVPIERMVVPVQDKVPHNVVERVVECFDRIVERIVEVERIREVEVERPIVEILRPVIREVHPVVREVTRPIVREVQRPIVRE<br>VERPIIHEVQRAVPVQDVRVERSYPVCMTRTSIAPPVTVTEHPPVRRSMGAHSSSAAYVHAETRRSLSPARVVEYAPARAARGSAYTARALDAADGVIDGKYFGRDIRVV<br>KELR                                                                                |
| 9484  | MTKQERRALQEQQRAAKQAKKDAEVQAAPAAKPTKAPASAPPSQAVASVSPAGPAAPSREGAKPAASAKGAPAKAAPAPAGPKQATPAPAQGPHPQRPQPGTKEAHKAAK<br>RGRVDLTDLHPAILRLGIQYQTHEIRGGNARCIAMLQALKQVIQDYPTQTQEMKPNHGRDVVQALNKPQIYLINCRKLSVSMGNIAIGLKHKITTCDAAKDISLESKKIVGQYI<br>DMFIYERIVDADRITSHGVSKAVEGDAILTFGRSSAVEMILRTAKQEGKKFTVCVMDSGPAFEGKGFAQRLALHGISCITYLLSALSNVIEETVKVFIGAAGVLTNGSVYSRIGTA<br>MVCLMEASHYQKPLVCCCTYKFTDKAWFNLSLTNEEGDPDDLMMVKDDANGVSLQGDWRKQENLSLINMQDYLTPEPYITMLITEVGPSAGPGRGPQEMMSGGSTPTLCLA<br>VPPKTSCCIHLWDHAYPFGFHNRPFPVPHRGAICLPGTASDDPADLCARDHPRVPPESEERFLAGPSWQALACLHYHTPW |
| 10009 | FNVSEPEKKERSGVLDSYWTYHIYTKTNSNFVQKELVCVRRYNDVFWVREQLVELYPGVIVPPIPEKSVKGVIEKLSMISAEGLLQYRQALRKFLVRVGAHPVLCTSDLLREFL<br>ELREEDFNRRALKPRPAAPVPIGQKFRLELSFMAKSFGGSAASPATSSPTAAVAASAQPLPAEALPAGAPGARWEETHRYIDQLERSLCLLKERIELLVKRRRETSLSLEFGKSF<br>VRGEIEEYEGTLPQALIDVGHSEHLSIVYQGAENETYQVETIYYCYGLTASVRDCKIKRIQKMALTHDITQDLSLTKLQDRTRRLQKGDEEQRRDLLEISNTSQRNDELAHEI<br>AHAEATFAEELRRFHREKQYDIKQMLRAFDVLQTEYFGMKMASWDAVAPSVAEIKTD                                                                                                                                         |
| 10196 | PMSPDALPGRKKMDPAAPHKFWDTQPVPRLVESPAITNAGEGINSDHKVEDVQKEPYKIPDAYEWFNPVDVHDDGDTVIAIYELAGHYVEDDVSFRFAYPKEFLVWALT<br>PMSGWLWDHIGIRVRASGKMVAFISGIPALRLREKVVVTINEFLCVHAKGRSLKRALPIKUEVTRRVNLQNIWQAVYTAIVLPRPVSSCQVWHRSLNPKLISIGFSRVPYQF<br>EKQRPMEMTKRHFALPKDTALPLRPMKEEDVPVKLALLSEYKQLFLAPHFEEQDIRHWFLPRDGVINSYVAEKDGAITDFVSFYTLPTSTVIGNTKYSLLKKAISYYNVATTDDI<br>VKLMNDAILARNLDFDVFNALDLMENGKVFRELKFGIDGHLQYLYFNRYFPDVEPKDMALVLL                                                                                                                                         |
| 10462 | MAGQGTIGLEMLAVQPDLDCLLVAVGGGGLISGVATAVKALKPGLEVIGVQSSKFPAMVNAVKGTYQPQGQTIAIEGIAVGVPGLLTQRVIEKVDVDFLIVDEGDIEHAIVML<br>LEIKTIVEGAGAVGLAALLKYPDRFADKKVGLILCGGNIDPLVLAAIERGMRVBRAGRLTRMWWVNARDVPGSLARITQVVAEAGANVDEVHHHRAFTMQSVQLVDIELVLQTR<br>GRAHIARVIEALRKAGYEATEQQHFQPLRSPALRPSAARLPAPL                                                                                                                                                                                                                                                                             |
| 10778 | MATGLDKKISDLDLKGKRVLMRVDFNVPDQDKTGVITNPQRIVGALPTIQLALDGGAKAVVLMMSHLGRPDGVPNPKYTLKPVAEKLQELLGRPVTFLSDCVGPEVEAACAP<br>ADGSVILLENLRFHVEEKGKVGKDGPFKATPEAVEQFQASLARLDGVYVNDAFGTAHRAHSSMVGLRGKTACVAGLLQKELEAFCKVLDPAEVKRPLAVIGGAKVSDKILLI<br>ENLIEKADALICGGMAYTTFMKTNDHMPIGKSLYDAKGAIVPTIMAKAQAGLDVLPVWDWACQDFCNDQEKIKVTKEEIGPDGWEGMDCGPASMALFREKILACRTVV<br>WNGPAGVFEFDNFSGKTKAVLDAVAELTKAGHVGIIGGGDSATAAKFGMEDQVSFVSTGGGASLELEGLVKLPGIAALDDK                                                                                                                           |
| 11076 | MLATSGEKPTWFPGEAPAWLTGEFFPGDRGDFDPCGLARDPVDFAKFRDSEVHFGRWAMLGLVGLVPEVFGNLGIAQLPAWYDAATVANTSNDLYGNPNLVHASNV<br>FIALSTLLLMGPVEAWRWNGALASEAKSAERTTYPGGFPDPLKLGAPELKLKEIKNGRLAMVMGMFGFWAQSYVTGEGPLANLAAHLADPAHNLLNTVAMFAASGEKRP<br>WFGPAEAPAWLTGEYPGDRGDFPFLAKDPEDFAKNRDSEVYHGRWAMLGLVGLVPEVFGNLGIAQLPAWYEGAVANTGSLDYLGPNPNLVHASNVPLIFFTLLLFPIE<br>AWRWNGQIAPDAKSEWTTYPGGFPDPLKLGAPELKLKEIKNGRLAMVMGMFGFWAQSYVTGEGPLANLAA                                                                                                                                               |
| 11216 | MDSYSPSTSDDLAGPRRASISHSVSDLSRGVSEMVRPAVVSTEYRAASGPERGGSLSSAHLPEASAGLEFGRNTSWRWVQQYGGAGKAPALSAQEAIVIRQLVVDGN<br>ALPNQHGPHADIDGRLSIPTSLEERYQAPLTEAEVQRLRASYYAARGVEVRQESHSDPDMRSGAAGFDRRSSAPVPPRPVLPPLPRLVSSGADRPVPPVPPNSVQSPKVGSI<br>PGFDMSPPTIAIATSVLDGSFAPTRANTSVGSGAPAGAYRAVSSGYFAHPHPRIVSVVSEYSGGSLPSRNVSEATSLPHGGSAHLHTRVAAGPPSPSEPVGIGGGQWGGVGAVE<br>VLVVRPSSLAQPLPYQPARLSPDGAGGGPPAPLDHVFSTFGYPTSPRVSRGAAPLPYDVLPSFPMNSRARVSRTYATELAGHRKQSEQNA                                                                                                                 |
| 11395 | MLPDMNAPAGNVHGTTLRMIEQAGFVVATRLCNRPDHPHPLMGSVLQYQMSFQPMHVGDLARLTATPTFTSNNRSEQDVAADVADNLMTGEVRHTNHAVLNYYAAV<br>DAATGATIDFVILQVPTTPEEQALFDAGRERYQRLTSQQQKVNPSVPSPSTPVIVPGPQPTGDSAISLVQMMLPGDCHHSNVVGGGVILKMDNAAAVCAVHKCQSNVV<br>TVSIDLTVLFSRLRIGDVAYAKARVVFTSARTMDIQVEVEVERFGVEHPIRTQGVFAFASLDPTGRPQAIPPLRPQTSEAVALFEVRQKQYEEKRAREKSKAAPAQAEPTGPP<br>AAAAAPSP                                                                                                                                                                                                         |
| 11747 | MPSRKKQVESDDEDDDDHEDGPDIDVKNLELRLIDPDYAEKFVASLDVAVVQGRVRLQGMQTTMNDLHNKYMEEHKALEKKYETLYGPIFKRAILSGOREPTQEEVT<br>QGGEDEFKEPEDANQEVSDAKGVDPDFWLTKLNHDAVCEIIEERDEECKSLVNITAKTFDDPDGTGFVLEFHFHAENPFTNTVLTKTYLHVEDEIVMDKAECEINWKPQNL<br>TVAIKKKKVKGRGKGTQJTKEEPCEFFNFPPQPLPDDMDEEDEDLGDTELEIEQDYEIGCAIKQDVAKAVSWYTGAAADHDDDDDDDEDGDEDDDDDDDEDDE<br>PPPRRGGRKPEAKKANPNNAQPECKQQ                                                                                                                                                                                            |
| 12086 | MAAVRERAEVLDVMEEMKYFSERPMTPISHAVHFHFALHQTQKAALLQGALFLKAEPLIRLAHSAHLPDRLPRGLSGLAAFQVQVREMFDTDSFRELRAFQFSKPAPSWEDGQR<br>FHDMLSVIQSRHKRVPPIEVFGQCQLRTQLQRTHGANWADHPDRQLTQDVLDEFFGARVVVRFLIGQQLRLHAQVYRGESHADVFGILQLKVDSHELMKASIATAKRMALA<br>SFNVCPDIELTCKCGTPIFIQYGIHQITVRLLRHAIMGTLKAHGVKVKAGKAPPVTTIVADAGANEELCIRVQDSSLGVSRSLRYLWSYLHDDVRLGEQEWVAAATPEDQQYG<br>ESFGLPLARVRARLFGGDVVVQSVLEGLDMMYAYIPKFKAEVLARRPFPN                                                                                                                                                    |
| 12275 | MSPAPAAPALACGAAAGLLVIAAAAAFSPASPPPPAALYRAAVPVRVGFVAVRPIQAVSHARQGRLAGPAGSAQLEFGAASESPASHVAGYVGRTLFAMGAALAAASALVLW<br>LFREEEQPVWMAAAGKFGGPPKVVPKPVKKPEEEPCPCSGTAYGLCCQSYHQGKAVPATPEALLRSRYAAFAKKKRDIFRTTDPHELTNRNNVTETEHMESVTLSCNNVE<br>YSQLVILKQEPGETEDDWWITFRYWFGFTAEFKGRHKGVTRQSVKEGETETRTERSLFRRTDGVVRFVDSDEFNCNSDSFEVGDTSATQNLLLKAKDAAANVKQLAAQAVLP<br>KMEVRLQQ                                                                                                                                                                                                  |
| 12357 | KVHISLVIGHVDSGKSTTTGHLIYKCGGIDKRTIEKFEKEASEMKGKSFYAWWLDKLKAERERGITIDIALWKFKTAKSVFTIIDAPGHRDFIKNMITGTSQADAVALVIDSTTG<br>FEAGISDKDGTREHALLAYTLGVQKQMIATNKFDDKTVKYSQARYEIEKKEVSGYLLKVGYNPEKVPFIPISGVWNGDNMIEASENMGWYKGLTLIGALDNLEPPKRPSPDKPLRL<br>PLQDQYKIGGIYVPGVRVETGVLPKPGDVVTFAPNNLITVKSVMHHEALTEAVPDMRNVGNFVNKNVSVKDIRRGYVASNADADFTQAIVILNHPGQIGNGYAPV<br>LDCHTCHIAKFATIQTKIDRRSGKELEAEPKFIKSGDAAVILMKPQKPMCVESFTDYPLPLGRFAVRDMRQTVAVGVIKSVNKKENTGKVTKAAQKKK                                                                                                      |
| 12528 | MSSWQEQFDVTCIEKIKYIEAIEPVEKRFQYELFKPSWFADTLKPSKPVFLVGLPFSAGKSTFINYLLGHYDLWTGPQPTTKFTVLMHGPQNTVSGRILCSNADMPFRGLAE<br>FGNQFLETFSGMQVPSDLLRNVTLDITPGVLESAQEVHTRTYDIYIKVARVFEVEMADLVFVMDPSPKLDAGVELRNLFNQLKGHESKLRMLNKLADLCEPQELMRVYGSFLWS<br>LSNLHITTEYFSGVWKNPYRTQONKELDFEAKADLMDFLLEVPVCLQDKRVTAVMMRRALDVQIAHVVGTMTKMRPNMMDKMSAKQKMLANMDPIYDEVATKYKLT<br>RADFPDPKLYSAFFDKPQVHMSEMPKLTDFEKEAKKGAENPLKRLERIIRFDLPKLLHPLAQAAAADPRKARKERQGGNAPPDKAVFLDQLQEKQKPKPARYE                                                                                                     |
| 12831 | PQLPAHHLQAPLNGHVPSIPLVEAGAVKGRLLVLAGSACAAIATAVLLGRRGPTPLRLRSTALRLVEPGSPLVALAPSSPGWRRPMAVAEAPSPLLRDTEDLQAVLMELELL<br>RERQAAITEYLQAPHEDAELDVGLKLRVKQIEEWRQREKAIEDVFDLQKHAHPSKGVGARVRAAVEAMRRRTEDALEAFARPAEVEVRGRVLADLWSLRQRQRTIEE                                                                                                                                                                                                                                                                                                                                     |

|       |                                                                                                                                                                                                                                                                                                                                                                                                                                        |
|-------|----------------------------------------------------------------------------------------------------------------------------------------------------------------------------------------------------------------------------------------------------------------------------------------------------------------------------------------------------------------------------------------------------------------------------------------|
|       | AVKELPKSKSDVAKARILAELEELRSHEAALEAFLSPEARAGKKAKKGGEDAMRVRLVESLLALRQREDALEASASAPLEDVP AEALPELQAGLASEVEALKWQEALEDYVRAHLKE                                                                                                                                                                                                                                                                                                                 |
| 13018 | MAPPLFPNVICCHILLCTITCALPLATVRTGTCECWREWMQKERRYQRAKRLRMKQPCEDGGKSYDTNIPWFCEPTRRLPPEMTGDGPKWACGMETFKKHPKVLLVSMGCWGEIDWERAVRGWLPQAEHMLIDPSGHGGWDLPTKLEQLKPLNVTFHEFWIGSTHVPGHKFPVLSVVEAMKRLGHAGETIDILKVDIEGHEWKALPEIASGALKFHHFNVEVHNMNCREHIPFAALDKQDYRMFYKEPNHWGCGSGCIEYSFVSKEHACAEFATAHNCPPCSQWLNGPRSDAKPDA                                                                                                                               |
| 13288 | LYVGWFGVLMIPITLLTAATVFIIAFAIAPPVIDIDIREPVSGSLFYGNNIITGAVVPTSNAIGLHFYPIWEATSLDEWLYNGGPYQLIVCHFFIGICSYMGREWELSFRLGMRPWIAVAYSAPVAASAVFIVYPLGQGSFSDGMPLGISGTFNFMIVFQAEHNILMHFPHMLGVAGVFGGSLFSAMHGSLVTSLLRETTENESINVGYKFGQEEETYNIAAHAYFGRLIQYASFNNSRSLHFFLAVVPVVGIWFTALGVSTMAFNLNGFNFNQSVIDSQGRVINTWADIINRANLGMVEMVRQV*                                                                                                                     |
| 13428 | MQQTVLRLSNGVDMPAIALGTWKSPPGLTGAAVKAAVRAGYRNIDCANDYGN EAEIGAALAEFAAGEVKREELFIQCKLWNSNRHKEHVRADL LASKDLQLQYIDSVFIHWPQACPSTGKAPAVCKDGPHPGPKDSGCMFLEADGTYASDNACHYVETWHAMEELVDEGLCRSIGLSNFNRRIQIRELEVAKKHRPVLQNEGHPYLQKQDL LDYCRREGIVFQAYSPLGSFDRPWAKAGSITSGPPSTGHELLTDPVLVAIAEKHGKTPAQVILRVHWVQRGAAAPKSVTPGRIVENLAIFDFELPAAAMD AIGLLNCGRHLVWAETAMHPDYPFKDELPHGYIPGPAPTSTTSSGQ                                                              |
| 13576 | LDESPNNVKLLFEQGQAYFRLEEFETSVNVFQKGLQVAGASTLPEDKELVKKLELWVRKCNANLSEDKQVHIDVKPEAALAQAPPTPAPAPVAPARAPPEDQSMAKVRFEWFQSLTHVTVTFFCKDRTEKDVVEYGANSLTVSIKLDGDKKEYQHSFSPLYSEVVVAESSHSVGYKLEIRLKKAKDIQWRAVDRPGEAPEAVEPTASSAAAPARPAYPSSRPVKKDWDKVTADIAAEANEKEEGDAALNKLFRDIYSRADENTRRAMNKSFVESGGTVLSTNNEEVGAKTVEGTPPKGMEKFLAGE                                                                                                                     |
| 13640 | HVAHAGLVFWAGAMNLEFVAHFVPQKPMYEQGILLPHLATLGFVGVDGIVLDITYPFVFCVGLHLISSAVLGFGGVFHSLAGPDTLEESFRFFGYTWKRKKKLAAILGIHLCFLGLGALLLAWKAMYGGGVYDTCWPGGGGDVRSINTNPLNPFIFGYLVKSPFGGEGWIVSVDSMEDVIGGHIWIGILLVSGGGFWHICSRPSPWVVRTFVWSGEAYLSYSLGAVATMGFIADVPMVWFNNTVYPSFYGPTGPEASQAQAFTLIRDQRLGTNIASAQGPTGLGKYLKMSPTGEIIFGGETMRFWDFRGPWLEPLRPGNGLDNLKLNKNDVQWPQWERAAEYMT HAPLGSLSNVGGVATEINAVNFVNPRSWLATSHFVLFAFFVFGHLWHAGRARRAAAGFEKGIDRSREIARKLKPLD* |
| 14460 | GLDVPTVTLPSKHQMRMSRLPLREEVAVGVAPATTPEVGLEAATGAKPRAWPRWPHALGLTAAVAALLATFSVSRHRLARAAAAAPFVQQAEDAPWCVVPLTGEAFDPLGLNEDGEPAGRSFKTRYGQALLFAWVATFSAPFASAADLDVFAGLDESQKTFVNFILFGQAVGFLGLLATANVVRQQKEELDVLEDTLEKVYRQLRQRARARQGELLAQVPPVLLSPVLDQDDHEEELQRAVVQLLRHGRHALKEQHGAALREFQAAEQLLRGGGHLEDRLRFERKAERGVAALQLLGRTEEALASLQRVLDMTKTIGDSTGLEEYVGAMADLLAELGRYVEAGKYDDLHSNRVVEDSVTGVEGAL                                                          |
| 14530 | MVHIDNDVKLDFKDVILRPKRSTLRSRSDVDIERSLIFKHTGKPPWTGPVPMVANMDTGTTEFMVQALARHRMFVVVHKHYTTAEWTDFLHAHPECLPYLAASSGTSEADIGRL EICLAIEVPSPEGLTGQVYVCLDVANGYSEHFVECVRRVRLHEPHVGIAGNVVGTMEELLISGADVVKVGIGPGSVCTTRKQGTGVGYPQLSAVIECADAAGHLGGILVSDGCTCPGDFAKAFAGADFMVMSGGMFSGHDESGGELIERNGRKFLFYGMSSETAMKKHAGGVAEYRASEGKTVEVPYKGPVESTALDIAGGLRSACTYVGAGLKELSRRTT FIRCTQQLNPVYAANLEYAPQPRTVGKP                                                          |
| 14553 | MDGDRVVLPGPRPGGSPTASPRGLAGMAVLLAGVGGFGRSALSGSAAQLGHVPTAPVAALTPAVATGTAVASMAAPAHTLAAEGGPHVLPAVASRAAALADA AAVAAPDGLQLALGLAAAEALVGFWALLISRDAYADQSKTPIDVVEPPEQIEVSPSGIAKGVGYATSPKGWKLQADTLKARGVRSVSGAEVVRLAQGNVAIVDVRLYRFEQFSIPG SVNVPLFQPIDGWAPFKTLRRIQFALFAVEGTECNPTFMQELLAKVPRNKELIFVDDSI VATLQPTKNCPCDGKAGHAYMAMYRALNSGFRNKMRYLEGGIIEYKAGGEYVVA                                                                                         |
| 15305 | VSQIPPLDWKNPEIVASFEEAAVKHCSPDLDDIARVRTKISQIISNTLIGKGFVHPVQLFSPCSDPLNHETEVA SMSYQGTVTLTSQSMIFCKMLVLALSNDIKVFWVSPNVRKELNVKTAGRYATEFTQIDFESSLLDFESCLNIEEVITNVVNTLADEEGDTIQLRSGRRLQKLT EPMKRFDLGAEAEKLGISQGAEDKLIAENTVHPFFLTNLKREAYDRRDETGTGKNYVDLFPVVGELSGGEREFTEERLTRMHELGYNLEFVPLRVAREHGLKSSAGAGFGERLTRAILLLPDIQSVYPPFHAGLNVFEPQPSLGGGSPCHDRGWEVVTGFIATG                                                                                |
| 15630 | VNGVSYYTRTLNQHIPQYCGSCWAHGA LSSLDADRIKIRKAKGVDTVLAIQFILNCGETLAGSCRLGGNHLQTFEFITKTGYVPYETCQQYAACSRDSTEGSCGTGNWECSPLN TCKTCTNFADADGKCVSIDI FPNATISEYGPVAGADSMMAEIIYHRGIACALNAEPLVAYHGGVFD DPLAPKELNHIVSLTGWGYDAKTGRRYWIVRNSWGEYWGEMGYARVTMGGNQLGIETDCAWAVPATWTEVNPYCEDEGGNCHRG                                                                                                                                                           |
| 15795 | MYVDLGOHGDPLPVALSEPAHELRRRLQWPAALLAAHALPLGAGAAEATPAAARPPQVFFDLTLDGEP EGRIVVEVFPDVLGAQRFLDLAANTGGVGYRRSKVDFIAN SFVRVGEVPQLSISEAERSPIAGGASTAKLEAALGT AARRHDGPGVSVLLVRSTPQVFQEKLVARNGQMVTVRKVPGPAPPNGTAFICITTEAAPGLDATNLVVRVAVAGLDLVRERAKLPSVADNHGSPFILA KAVGDKRADVAERGFGRPFKVVVTRSGVL                                                                                                                                                    |
| 15813 | MKSLTAGSSLPKKSEEVATMCWTEATGESFNVRAVGYKTKNLKQPSGSLYD TVAVDAYSSPKKVPHFAQYVDIPEPEDGHGVPNVLVNLMPRYAPNLVWAAAGDGESW CVVLVCRLSAEAREMLRTNQSPALKLVKRFVEADRNDMPKRLKICVLRALNPTEVGFSTATPSRLINKYNAPKFMIRTTSSSFYTDGNYEIDIDIHNFGKTARIGLYGCSEVATQADFLSATSEIQUESTDELEPEQILFGVRLDKLNPVNVVPPFDIASPGNRNTPPRQASPRPAEAVPDTALPDTEAEDT VHPDEE                                                                                                                  |
| 16000 | TTACTTAEPAPHARIAALNIHPDVLAKYVGCGLVVPHCVQGLRVL DLGCGSGRVDYLLSALVGPEGSVVGVDMTAEQLEVAQKYIAWHTKEYGYPKPNVEFKHYIEKLD FPDNSFDLIVSNCVNVNLPDKPEPVLREAHRLVRPGGELYFSDMYASRRVPPALVADPVLFGEGMGGAQYWNDFVRLAQR CGFPDRPLVKDRHIAIKNTAIKAVVGHI DYSATYRLWKLEPELPDCEDYGQAVVYKGTVPESPEVFVLDGHHAMERGAFFVPCNGNTFAMLQQTTRFAPHDFDFIGDRSRHLGIFAGCGRALPFASACAPLAKGKGSKASC                                                                                         |
| 16166 | MVAIVFLASERTTLFSTQALGSTVPSAVVANPHMWTLQTERFHVAKGAATPIKEVYKGKNLMSSSF AFWAATLTSFTTFFLVFSRHRNVLSLAASGADAEIIGLSRREALGLSAAGALATSAPAYAFGLGEDAGYPGDTQNI AIEIKSVLVAADDPTKPDRI TLLRRDMNSYVAKYRRDTRYGGRASFGNVYSVINAVAGHYNTFGVKTPIPKKRATQIVSEI GTAEQLLAKGR                                                                                                                                                                                         |
| 17018 | MFVARTASFLALRSALRGCAVRSFNTPLQGGQQSLKDAILGIELAGEEFYRKLAMEAPELDEVFGR LADEEHIIHRTLEQAFANGTL PDLQGS DIVEVAHKTLRNIERHHSM SGKMSLMLEVYKMARDMEASNRD KYQSLMEKETNPEAKKIWEYLAAEEQKHFKAMDMDMVKFLDKAHVY YFF                                                                                                                                                                                                                                         |
| 17449 | PELQAVFRAVQGD LAALAPALATLSSVDEADPLGRTALHVAVLEGQEPALDILERSADPNRQDEEGNTPLMLAVGLGYEIEIKLLTKGGDIDIPNKQGANC LIKAVQRCNPELI AFLDKGASHVNHKTLAGKSALVCAVEKSKVDIAKSLLAGAEANQADELGITLFAVAFRNNADLIRLLEHGADAKAQSKAGRTPLMMMAVD SHLCRVETARM LLEAQADPNAQERLGLAMLAVDKPAAKDLVACLLEHRADVLDKKNRNTALDVAKEAEAEVDVLLTGAQQG                                                                                                                                     |
| 17548 | MSHQETAALLKSHCTINVSDETSASKSCLLSKIIRATGVACICLGSASFSGVGAAGLDVCVFQPTAAPQQLFSVPRSAIRNSLTGKTFVLSRPSTALKASKVPPAYEKA AKLAITGMLSAAAVANPAIATEQEDRLAELMKAWNEEYGAAYGQWDMMSGYRTAIKEAPKVAKAEAAPADIKISRKATQTLDPIDQVMAEWNKEYGSQYGTWDMMSGYRPTKAAAPAPAPAPVPAPAPAPVAPAPVPVPEVPKPEAPAAVLKEEPEAKVEAKVEKPEAVPVKEEAPVMKPLVKLEAAPVPVPAPEAPAKAEAEAPSEGSPLAVAGGVLFVAAGVLAATAPTGS EEQKPAAPT                                                                      |
| 17576 | MRSSAFPVAAFNYQVPETESTTKVNVAVFVPLAFGIGALAAVAASLLQKGKQPLATLATS GTQHIGRNRDSNSGTL EDERRRRQREERAVQERRQLRQREEQERRQMLAGR SVHQHQHQHHHAKPPAAPSARVVVPTPPVSPAPTAAATAVTATDAELRRRRREDREREAENAEQARREVQERLARLARLGPPSVQPVVPATPSPAPASDPVFDRESQMRRDARERAEREKQLQAQREI QERLARLQALSTAPPAPAAPASSAPAAPAARGNDWDRRQQUERERQEREKKERAQREIEERLARL KALGTAPTAPAVVRPPAAAP                                                                                              |
| 17693 | AAPAAALPTFGASSAAAAGLGSSAPALGLGV SASAPALGFGVSSSAGLGFGTSSSAPAI VVPEDPMFKEKTTAEILQHWSEGLVKDVKLFDKLGIQVSGWDDAIVRNGDKIVQLHFDVENLEKQAQAELEGKLESIDQQQRELKEALTAIETELDKAGPLALTQPDIERQNTFDLALHMNQHLNQMH RD IQRMV EHLNQSF EKAHTQSVDNPLSTIVKILNVHLLSLQWIDDTAPKLQAAVEGAHGAILRAQQDVVTRR                                                                                                                                                              |
| 18132 | PPFFPFWLSPSGEEELLVRPLVLGLALQQPSWPPQKQFLPRRQPRRERERRQRRTLRKTRKRRWKREAKENKAENKDEKVEKKEEKP KVDYEDKEMDCQDCNQKFTW TAGQOEFFASRSFGEPRKCKECTLAKKGKGGKGGKGGKGGKDAKSCRCGGEGLHAKCEPKPSSCYNCGGEGHNAKDCPKPKVCRNHKAGNCKHGAECKFHSHE                                                                                                                                                                                                                   |
| 18196 | PAATEPLVGASSFPISLSAPISAAAATTTTFS PAFPSTLPSAPTAFPAATPYPSPLTSSYNFPFAAPTAFPATFSTTPTSPAPLSSSYVSFSAAPSRLRPAGYAYPSRTPTVSGRVPAAYPVAGTPYRPTLPQNSPNSVLVSYYVGGPAPKSGPYENFTFSEVATNYRQEHLSPFWQGTAKPFRFFFTESN                                                                                                                                                                                                                                       |
| 18232 | PYTSPAALPFYGYSFAGASALPTTTPATSVTSFPTTFTPTTFTPTATPYPATFSTTLPTTTFTPTTFTPTTQTAAFPSTFTPTTFTPTSATTYTS PASATPGYSFPFAVSSYPVTTLPTSAPSFAPYFSPAYSATSAGYAVPTQARAVYPKPTS VAGGAAYPAWGGSVYRSRTPYAYARPATAPRQAPL VAGRSAPNENYTFKEVVNNLYAENIGSTASPWRANARPLYDDFTSFEAKTITWLNKL                                                                                                                                                                              |
| 18304 | MAFTAQHMYDDAAIPEAAPQRPHSAVVWYAALGFAATLALTTLAGPTAELFRPSPLRSAGMSPTLAAGLPRASMALGVGIDAADF RKGFTVEMEGAPYKVLDFQHSKQARQA AVIRTKLQNLMLTGNVLEKTRFSGERLDKAEI EYSEVFTYKDGDDFCFTNMETFVEERLPGTL LGDKVSYLSEGLGVKAKFNGKAIDMELPTTLDVEIVDTQPGEQGDRATAGTKPATIAGGKVIQVPLFVNTGDLVRVDRDDRYITRTK                                                                                                                                                             |
| 18668 | MTRSPYVAEGRSVALALAEARAAAKASEIESLRSLEADAKAVAAENRIRQVVAEVAKSQTRVIPQPPIRVPVVGGRSVPEIATWRKVFDYDELGAGNVSKHIIQARLAPEIGAFDWEDDDHDETPLTFQQFVDLMTSSSVPEKRF EALS WGRTKCPDKVPYADGGKPF TREYFVQEAQVPTRVSSVGYGYRW                                                                                                                                                                                                                                    |
| 19920 | QLYLQGGRVSDVPYLLIQNGELVSQHTFSSSAGIRVLLI MPLVAQKTFYDDVLSVSAENGLVLREGVKAEGVPVGAAGPASPDSKDG SANGDFDKEFGNSAQKLEWKDYDDGASSSARGSAGGDGLSATGGTVAHQAYFDDLAATTCTPELTADLSAESRWRQLSKVFQFPPLSPERRDRLLQVLEQQSQVMQY GAYDPASRGGGRF DARLGSPPYLPDSIALPWNAGSCPAIAEALAAQGYTLVSRNTRVILDRSNFRKLYRLRGLSDASGVNVLVLSKLVR I                                                                                                                                      |

|       |                                                                                                                                                                                                                                                                                                                                    |
|-------|------------------------------------------------------------------------------------------------------------------------------------------------------------------------------------------------------------------------------------------------------------------------------------------------------------------------------------|
| 20098 | MDRTLKSKRFLCQEHHVKRYGRHLQAVDAAGQFKCKADSPDCPPSCPCRAVVPGASACVSCGKLVRELPPDCRTVIVSHLPVFRVRHCKHLEGYMEKWGPVRRIVPKK<br>PNRAAVVFKTEAAQKAVMAKHETKDGTMWATMLKKGSSADTLPAPASQRRRVAKEEAVLRQQTAAEKLLARRKEQKRRARQRRRQVATAAGDAKAAPPKPSKSGSKDP<br>PPTTTPAKGKDKSAERPKKSQAQKKAKAAS                                                                     |
| 20283 | MEVQSILERSTQKSVLSKAAIFVACFTFCVAPLLLYFSQGNVQGTGYFKVATGENPRYRCHTTEGDFLVELFMDSMSPLTSSNFIDLVNSGFYNGIHFHRVIDNFMVQFGCPYARH<br>HRHPVWAGTGGPPPTSTFRVGNVYKVRDEQGCPIDEFTSYISNVAGTLAMANKGDPNSGGSQWFINMVNNQHLDDWWRHDSASAHVPFAKVVEGVGVVRRISKTLTDAK<br>HTPIKPIRMISITAAK                                                                          |
| 20527 | MSSSVNVKFLPHATTEANIQQFLGACGHVLEVQITDPTAVHAVVTVSSFDSASKAVAAFNHNFILGSHVEVSMGDQDHGECKVFGVGNLPSTVTQDELQRLFPGHGTVEVLLP<br>PRASQSDQRCGFKVFSYQEANSIAQINGTDWNGSKMAVRMADAGRKQNVYSALQQLPAVYAATTAANHMYGHGQPMHGMQPVAAALTSPTGTLFVGNIPSYWTKD<br>NLAAQFGPGYVLEETVILSRKGINDTQCGFVKFFDPQCASLAMQSLAGTVIDGLEFVVVRHADSKRQGEWQGGAMRTTRPLNQSWRPY         |
| 20595 | QTLVPLMKGLDALVILTSSSPRLTQWSAWKAKVKRWLGFKKVRRTYFYPKHESPEQIDWLGQKEQJDAAKEAGVRHIVLVGSMAGTVPNHLLNTLGKGNVLRWKRAERYLI<br>ASGVPTYIVHPGGLDSAGGRRELTVVGDDQLNTKFSTVPRADVAEVCLESRTTEEAKFRSFDLGSRPEGEGNPWDGNLKSRLRRQVVRSHFLAPSMMVVVLTSEIGYFMPIG<br>RYLFPPEILIKAGSQINIILIPKRGIFRSFTTSPPALPPF                                                    |
| 20996 | LVAWWSRNPDKYAKYVQKYGEPEFMPGLAETDDYEAQIMEALGRAQAAAPAPTAAPHPAVAAAASSDAADDEEEEGKDLPAAVRQVQRDWRRELDHLSDQARAEELLRL<br>RHLQDMEEARAAGVSEEMLHNLRRHSEELSLMREQNRLKHEIVRQKQKEEVKALLSAAKEANDVSTGRPTAADALAEQKQEFHRIAEIVEHLQQTCDTKDEVLNRMFELI<br>CYYEATINDYDVNVVIAAAAHGGAADADRQLAEARKREEELRTLVLFLQNEELEALRKAAPPAAPPSSPRALAGGLDALWLRAMAAPPSSAASTE |
| 21028 | MHLTATGEAIPSEGSQGETLAMPSSATLSGRGMFTAGVVMFSFAAAAVASLWLFRASETVSFAAVSGRRSMELRATLNCRLVPRDEPGVRYLGSSTEIPSPVPHRELVSIIQQ<br>WAANELKEQLEAKHFGFRMVVDYEDDRVVEGDTFSLTVRFIAPTDEYIVLEYCLDNETVKVARTIEGFKVEDKERQLGRDGTDPVRSISLLGTESEVSGRFFMVRRKEGPMMPD<br>VLRPMVSDFLKETAMALTRYAAG                                                                 |
| 21133 | PECFQTPYGTFFPEYAEADVPGGETSQAMRKAIDHKITLVAGSIPKEQDGKVFNCVSAWGADGALLGKYRKMHLFRNLTEKVKFDEGETLTAGDSLAVFDAGPFKFGMGICF<br>DVRFAEFAMSYNRLGANVLLYPGAFNMVTPGAHWQLHAKARAIDTQSYVIMCSPARDPDSCTSGYVAYGHSIVVDPWGDVLEAGEEETIVFADLDPERVAARVRLPIESG<br>RRHDLYSVTFTPGVH                                                                              |
| 21286 | MAHRVLLSSDVPEVYDLSLEPDQLKHTFSGEVVVHCDVRVATDVTVVHSRDLAISAAAFAGEGSPALDAAEIVVNKLPTTATFKFAEPLPTGKGQLKVHFIGTLNDQMAGFYR<br>SNYTRANGQPATMAVTOFEPIDARRCFPCWDEPAQKCVFNVTLTIPRDLTALSNMPESREEFVEGDRKRVTLPTPKMSTYLLAFCVGEYESMSSLTKDGVLLRVFSVPGKRAS<br>CAYSLGCVKALFEYNEFFGIPFPLPKMDMVAIPDFAAGAMENWGLVITYREVDMLCCLDATVAVARKQIRCAIV               |
| 21679 | MPGRREDKIWNGFNKKADGKQYFVGECKGCNEVVAGLTDRLKQHASECSKLQELNIWGDAPAAKRPKVQQLIFGATTIKNQKQSPFTQEQEEDMLKCKVCEKMMEEV<br>HLKMATTPGGAIEKGHRLDKNNKQVIKEQARIAARAIEILEDVCKSPKFDEFGTMGRTVCEDALQESDEELEQYVKANVESKAFATKVRCKKCAMKSELSMIERMKASMPPT<br>PVAKNLTFWDELQEAIAIVQGQWKLVLVASTCLTVLVAALRIAYDVRQERRQKKAD                                        |
| 22079 | MPVAPATAALKAAESVAAKNALFMTDLNKPVKVTKKDIERYAAQLDGEVAKMRAQVTEELNERYRKAVAETNTLQDVKKELSVVDQIIADVAVIREKIDTATGELHDAQRF<br>DAAEQEFIAAKLEIKMCEEYKNELTEYLTLLIQENQKQKTAKLEELSAAHSAGKLTEAGRQVLDMAKESAAVAESAQAASVSAADALLPPRSSANHSFNDTPDDAAPD<br>A                                                                                               |
| 22401 | MAGFFASILAWFRSLFWKQEMELTVLGLQAAGKTTLLNVISEGRHAAEKDITIPTVGLNTRKVTKGNVSIKLWDIGGQPRFRAMWERYCRGVNAIVFVDSADSNLGAATTE<br>LHLELSKPALAGIPLLLVNGKNLDPNALKVQDLIDAMDLSIKGREVCYSISAKNEVNIDMTLEWLKHAHKG                                                                                                                                         |
| 22409 | GGSHVDFAKLLYSFADQVENKKFEVYVEDFKLDSIIAEKGPFWAEKIFQSPTFQGLSEGKFIWGQWQSEGAIIDRENVRLAYKELVNEARKETTATVIVAKEPSGNDLAEIRKQ<br>VEELHKESPLKDYKLVLETKVACPPHGGSGFWFPC                                                                                                                                                                          |
| 22467 | MRLTAELIERYVQFTNPLKERELDLRGNKITQIENLGITEDGFDITLSDNEITKLENFPLFHRKLTIAHHNNRLCRIAAGLGKVLPRLETALHNNHFKELSELEPTDLNLLRLSLCD<br>NLVTKPNLVRFLVIAKCPKLKHLDFRKVKPKERQKQADNMFQKKEDAAAPKAVANGDVVAPAVILSAEEQQRIMQJIEAATSYEEIQKLEERLAGTAQ                                                                                                        |
| 22652 | MDSSRNESTQWSTTAIVCVTALLSVCVGATAGFIASQPSTNLYAPTAAVKPINIALPLVSSAARAPLPLHAVRVPDQGLEDSMFTTSSSEANQGQPWLTALAGALFASASLL<br>TFLRKPKTEENYAMLAEIATDPKEDKRYRTGPWPEKGFELSGRVISTTMDKTAVVLVERRILDKYHKFRVTKKYKAHDEFNEYKNGDEVVIRLSRPISTKSFVIGKLLK                                                                                                  |
| 22662 | MYGTVSASSPNKATSTVAVCACAAVFAVAGFVAVQPHAHYTPAAVRPAVQTTMTTIPAPRSFQANIVSATQMOSQSQQMESSVSFQIGAMSVPIFSLGFGAVAGALGGRL<br>ALKLFSSSGASPELFEKVRVSIKELGIDEKATPDANVQELGADSLDLVELIMKLEDTFGISIPEEVSMMKITTIREQGCTGIFTKYDYSHLATSLGHLR                                                                                                              |
| 22828 | EDEARLQAVAAEALLEVKARIAAVSARQSRPREPRLVAVGKLHGPELIRACYDAGHRCFGENYVQELVDKSSLPEDIEWHFIGHLQSNKAKQLVEGCKGLATVETVSDKLAACL<br>SAAVQALGRGPRVRIYQNTSGEESKSGVEPGQEVPLAEYITRECPGLIFAGLMTIGMPDYTSRPFNFQCLQQCARVADRGLVPPDSELSMGMMSGDFEAALMGSTNVRV<br>GSTIFGARPKK                                                                                 |
| 23031 | MPPLGRPPLPGPGALRLALRQFRQVGHVRHPLAFDFGLDVLRYGIERPRVERAAHDVAKFVQDVVPPALEQRRRWVERCYLAPPVHCITVPQEVVDEPNIQAYARQEAETL<br>QRLLDHAIREAQQCAPVKCKTAAMVWTVLSSPFYKRFHQKLEVIYAKVSFNMMPMRDEALEERFAAIPGWLPIGVEAQVVTTRRVENFTCLPTLEGQKDSGTGGLSLEKCYG<br>P                                                                                           |
| 23275 | MSHSQEVYSIFRVFKTLFEMLHDRGYLVTSEDLQLTVERFKQEKCILEGEGDQAQFRLKPRNSLWLLHRLKSDTSDIGVFFPDDEVKMGVKPIRQYHDMVEEKIKRAIVVTQQ<br>APTFFAKQAMAALTAQGMIFETGFGENELMVNVTKHELVPKHEPLTDEEKEFLRTHKLKEKDLPRIQQSDPVSYQFGMSKGQVFRITRKSETAGTYITYRLVM                                                                                                       |
| 23444 | VTSLSRGPPDAPQLASQEWVRRVEWLKGDVLQRDWRTHLSPDVAVVSCVGAFGSNDVMEKVCBDTNIAACEEAAAAGVPRFVFSAHDYHGIGHGVGLRGYFNGKR<br>RAERRVQELFPQTGHILRPSFIYGTGRHAGGYALPLGLVGAPLAAVCALPPVKFLATLPVLDLAFTSPVAVEAVARCAVQAATGKLVKPILDVDDILRA                                                                                                                   |
| 23771 | MFRTRMLLTFNAKFFKDRFDLQLVPPVWTGMSAERDWWQYPLHFVVAVGNQKDIADALYNVSKFTGQCGRDSLPEGHVSVNDWHRDTLKTPLDFAVHRADPEIVSLLLK<br>RGARPSLTIRLAEELVQDVQDPTYAERMHQTLQKVHSGDEAEAVLKLVSADAYRNKPLHDVPIAGPPVGW                                                                                                                                            |
| 24159 | GLPPGIDPAALANNPQVLAMLQMLQAQGGQPPQLSPLAQAALQAIQFDQLRQVIASNPQMLQAVIQQLRTSNPQLFQLINQNPQEFIQLLQNGIPSGAGAAGLPAAPGA<br>GAGGVPPGVIQVTPPEKAAIERLAALGFPERVAEAYLVCGKNEELANFLFENGAMDFDDGAEDEGGN                                                                                                                                               |
| 24336 | MTEDPDQVAFRIMRLRPLKGHRRQRPMDLQLWFTEDRTIGYVLFDLTASASALWGMVSNPPRRRTGLASLFSVLWLQLCICWGVEPRTTRIDKPLLSVLQRFGFTPLSSG<br>IALEVAPPGAGPATVVWAEDAERLSRVFSWRYLRSQNLEIAAQRVPVGGTPVCVNTAYAAPDAEVWQTCVARLVAGRVRLHGPAPGGPLKGPGLFRLLAEVDSLPTHYLYQ<br>HLALHSRGDA                                                                                    |
| 25106 | MNNNRQGLPPAPKTSGGKGKSYDDEGKNRRRPTSRSMKAGLQFPVGRHRRMKDSLISGQRVGATAAAYVMAAILEYLGAEVLELAGNASKDLKVKRITPRHLQLAIRGDE<br>ELDTLIKATIAGGGVPIHIKSLIQTPKSGPSKKMPTTEENP                                                                                                                                                                        |
| 25253 | MTDLDQRSLEYASEVSNLRDKLQNIIVSGRSKDGAVSVQYWGTLVLSQLVKEDQDTLNAVLSGIQQAINDGNERLCQEAEEQQAQFDEVWQSMFASLAQKEALQYPFPSI<br>KRTLQGERYEQAVQRRMRQYLGPLAGPGAAAAGEPPAATAADAGEEKAEAAPPAPKEPREPKAEQAAPPASADGASSTPSCADGPPLAA                                                                                                                        |
| 27401 | INGSWAIHQDATGRAKDRTLSLAMGVGCGHLETTFEKEVSSDLTGERCVLGMGLMQGAFAQYDVLRAAGHSPSEAYNETIEEALCSLYPLVAEKGMWDWMYANCSTTAQR<br>GALDWAPKFEAALKPVIQDCYNEVLAGREAARSISKNSEPDYREKLEAELAEIADQEMWVAGRLLRPLRPENSKK                                                                                                                                      |
| 28113 | ADAKQREIQERLARLAKLTGQTVPAAPASAPVSPRAAPVSAAPASSEWERRQQDREFREKKEQAQREIQERLARLARLGSTPPAQPAVHAVASGDSALERLRIQREQRER<br>REREAEEAKKREIQERLHRLQLSAQSAAPAYASKY                                                                                                                                                                              |
| 28941 | MHAAALLLCLLPCAANSRVHLLVLKTLNKFVEVGDVSVTINVFNVGKSAASVVEVDDTAWADKVVQVKGSLATSIDKILPGYNYTHEYVAKAVAGPTLPVGATKVITYHS<br>DPKEDDSQGGKVVFSNLPALPIFTKAENYKRTTRHLEWFTFFVLAFIPVGLPAVMYFTARKKLQELDEKLNPPAPGAKGKGKKA                                                                                                                             |
| 29430 | MPLTKADHGTITLAVKGEVLELTLVGNPTTGYQWLPAARKLPENSELKDLGSTYKLVDEPELCGSPGVYTFKYEYVQGPGTIALEYRRDWEGAVPALEVFEVQVALK                                                                                                                                                                                                                        |
| 29936 | MFVSGGFLMTGVLGYLLKKPLAPQSSITLAAATAEAPEQVNVKDSMKHMMTSQGFYEAYELVMLISPRLSLEKEDRLASLEVLTQHKCKKVEKTDGRRRILAYPMKGAVEA<br>YVIYHFKGPRSMFKFITEWHTGPGLSNDGNVLRCLSMKQQLLKAESVKPLPIEDEPPMWSV                                                                                                                                                   |
| 30241 | AGCGLIEGKALTALGAHWHTQCTFCSCGDAIASSGERSLCALENQRPVCAKCRTSHACAAEGEKIQGQVMTALGKKWHPSCFCQCGKCKEKITGSFFHRDGVPCYSSQCFCQ                                                                                                                                                                                                                   |
| 31431 | DISGQSYFRMIDQYVQDKARPANAPPEGATSVLENTSVCAVYVDVTKDSFDKCMKWLEVCRKQKRGMTAVLIGNKADLVERQVSPVVAEGFARAHGMEFFQLSSLQR<br>SEVEQPQFHIAHAFYRSYEAKLKALGQVE                                                                                                                                                                                       |
| 32126 | VQATMTTVPAHVSQSNVAAQIQSRPLNVESNVFAQVGSTFAPIALGVGALAAFAALIHKGQQPVAMAASSGERLLWIPNATPPAHLTGEFFPGDRGFDPLGLSKDPKVFA<br>RMRISEVHFHRLMGLIGVCGQEWLFNKGAWFDYSDFDLPRLLGLALQVIAPLEYWRNGNGFSWNGNDGPDPSYPGFDPLGLTTEDTKLRE                                                                                                                       |
| 32885 | MTKGTTTSFGKRNGRTHKLKCRGKRSWAVQKKRCAACGYPNPKMRSFNWSEKAKRRNTMGTRMRHMKNVLKKAAVRQRQDQVAPHQKRKTAENRKKFALSRTKLA<br>KDAKKA                                                                                                                                                                                                                |

|       |                                                                                                                                                                                                                                        |
|-------|----------------------------------------------------------------------------------------------------------------------------------------------------------------------------------------------------------------------------------------|
| 33811 | MGAKGAKPQYATPYGAYGPRVGQIPNPAVRGYPRPAPAAYPAPAPVYAPPAPVYAAAPTYSYAAPVTSYAAAPVTYAPSYAPAPVTSYAAPVTSYGYAPSAVAAPTQGAAFA<br>LDAADGVIDGRYYGSQVGVTSPAYGY                                                                                         |
| 34869 | ADPIFNGSKVRSIQMMRSYHRLPVGPEPPHLKIRGAPLHPWSMYTDKGGFFFGVGTQLPRNFFPKFLATTS AIMGVTYGLVWLYNAAGPRAKTQTRKWKELESEDPRFPFQ<br>EIP E IY L P S D I D R D P N A D C W R I L N Q V P R K E K L L V E I T D P L R N F D F K V A K I K E N             |
| 35001 | LIYAALNDPEAPGRAVNWAGFYLRGGDDLVLGPFQGVACIRIRKGRGVCACWAEGKAQLVPDVHKFPGHIACDSVSESEVVLP L T D K S G R F L G V L D L D S P V K D H F D A V D<br>V D G L G R I A T L L G N G C D W S P V A P A V T T G L Q                                   |
| 36724 | KDITAAALNDVAKFTGQCGRDSLPEGHVSVNDWHRDTLKTPLDFAVLRGDPEIVSLLLKRGARPSPLTVRLAEELVQDVQNPTYADRMHQT L Q K V H S R D E A E A V L K L V G D A Y R<br>A V                                                                                         |
| 48568 | EAAKTSFRISMALFAPSYTEQSYVPPQKEKVDVVLEGVFQKIDLVGNQLCATAAELEELKAEIGNSNTILDRELRTQLQQANDEIYRLRNQLSEYTD R K K                                                                                                                                |
| 49190 | MAAACAVRGFTTARPMLTPNKVKVPGRKPQDEEDLTWAEADRKLTP E E R Y A R D K Q M A L L D K M T S Q V E E L K S H T E Q K S N K G V K A Q I E A I S R Q L E A L K A Q L K E                                                                           |
| 49725 | FYE E P E T L F D K N G R P A Y P K A T G P G Y A P Y R D P L P E L P T V Y N K S G K P I K P G V P P G Y V P P G A N F P P V P K G T Q M V N G P K G P T L L C K S K S I A N V C F M S Q C P P                                        |
| 50778 | AAWSLPSRPALAATGPRVLVAGATGATGKLT V Q A L K A Q G A D V V A G V R N V A K A A S L G V P A V P L D I T G R F D A L V D S L K G V D V V V S C I G F T P G N P F E F S K A A H A V D N V G T V A L V<br>D A A K A A G V K R F I L M S S I L |
| 52389 | HEIRQLEKKDLLKQLDDLKTELAQLRVAKQTSGAASKLCKIKIVRRSIARVLTVLNMKEKNTLRKLYKNKKYKPLDRPKTKKERLALSII D R R R K T A R Q K I L H A Y P M R K Y Y V K V                                                                                             |
| 52992 | MSTFKDSNLLFPPEASEKRKHKLKRLVQGGQNSFFMDVKPCSWAMYGCNLWNNFSLFFCSTIVFSHVAKVVVCSSENTVLAQPTGGKVCFSLSSINVTPFNYFRQSSLKVAPS<br>A R S Q N E                                                                                                       |
